# Supplementary material for: Molecular insights in the pathogenesis of classical Ehlers-Danlos syndrome from transcriptome-wide expression profiling of patients’ skin fibroblasts
Source: PLoS One. 2019 Feb 4;14(2):e0211647. doi: 10.1371/journal.pone.0211647 (PMC6361458; doi:10.1371/journal.pone.0211647)
Supplement: S2 Table — (XLSX) [file pone.0211647.s002.xlsx]

## Sheet: S2 Table
S2 Table. Full list of differentially expressed genes in dermal fibroblasts of cEDS patients
Column #	Transcript ID	gene assignment	Gene symbol	RefSeq	p-value FDR 5% (cEDS patients vs. healthy donors)	Fold-Change (cEDS vs. controls)	Fold-Change(cEDS vs. Normal) (Description)	Fold Change(cEDS vs. Normal) 95% lower limit	Fold Change(cEDS vs. Normal) 95% upper limit	F(Type)	SS(Type)	SS(Error)
19377	8048205	NM_000597 // IGFBP2 // insulin like growth factor binding protein 2 // 2q35 // 3485 ///	IGFBP2	NM_000597	0.000102627	3.46061	cEDS up vs Normal	2.17839	5.49757	34.8488	8.88308	2.80394
31469	8166202	NM_005314 // GRPR // gastrin-releasing peptide receptor // Xp22.2 // 2925 /// ENST00000	GRPR	NM_005314	0.0050786	3.39257	cEDS up vs Normal	1.5694	7.33372	12.1644	8.60117	7.77782
17810	8033257	NM_000064 // C3 // complement component 3 // 19p13.3-p13.2 // 718 /// ENST00000245907 /	C3	NM_000064	0.00276377	3.10587	cEDS up vs Normal	1.6211	5.95053	14.7178	7.40274	5.53277
15222	8007071	NM_001254 // CDC6 // cell division cycle 6 // 17q21.3 // 990 /// XM_011525541 // CDC6 /	CDC6	NM_001254	0.000420096	2.70341	cEDS up vs Normal	1.74081	4.19829	24.7302	5.70072	2.53568
5476	7909568	NM_001286229 // DTL // denticleless E3 ubiquitin protein ligase homolog (Drosophila) //	DTL	NM_001286229	0.000410532	2.67979	cEDS up vs Normal	1.73453	4.14021	24.8754	5.60058	2.4766
28984	8142981	NM_001018111 // PODXL // podocalyxin-like // 7q32-q33 // 5420 /// NM_005397 // PODXL //	PODXL	NM_001018111	0.00352099	2.63611	cEDS up vs Normal	1.48025	4.69455	13.6666	5.41539	4.35876
16204	8017262	NM_032043 // BRIP1 // BRCA1 interacting protein C-terminal helicase 1 // 17q22.2 // 839	BRIP1	NM_032043	5.16477e-05	2.55576	cEDS up vs Normal	1.84974	3.53125	40.808	5.07503	1.368
30262	8154512	NM_001040272 // ADAMTSL1 // ADAMTS like 1 // 9p21.3 // 92949 /// XM_011518063 // ADAMTS	ADAMTSL1	NM_001040272	0.000229115	2.50991	cEDS up vs Normal	1.72047	3.66159	28.7649	4.88109	1.86658
30009	8151871	NM_057749 // CCNE2 // cyclin E2 // 8q22.1 // 9134 /// XM_011517364 // CCNE2 // cyclin E	CCNE2	NM_057749	0.000421716	2.48406	cEDS up vs Normal	1.66028	3.71657	24.706	4.77187	2.12461
31414	8165705	ENST00000361681 // ND6 // NADH dehydrogenase, subunit 6 (complex I) // --- // 4541	ND6	ENST00000361681	0.000271321	2.44823	cEDS up vs Normal	1.68239	3.5627	27.5942	4.62072	1.84198
7129	7926127	NM_001025076 // CELF2 // CUGBP, Elav-like family member 2 // 10p13 // 10659 /// NM_0010	CELF2	NM_001025076	0.00802738	2.44299	cEDS up vs Normal	1.32897	4.49086	10.4274	4.59864	4.85116
17215	8027348	NM_001277403 // ZNF730 // zinc finger protein 730 // 19p12 // 100129543 /// ENST0000059	ZNF730	NM_001277403	0.00161893	2.42603	cEDS up vs Normal	1.51607	3.88215	17.215	4.52716	2.89275
28065	8134339	NM_001040152 // PEG10 // paternally expressed 10 // 7q21 // 23089 /// NM_001172437 // P	PEG10	NM_001040152	0.000734857	2.41109	cEDS up vs Normal	1.58601	3.66539	21.3868	4.46428	2.29614
31134	8162777	NM_005458 // GABBR2 // gamma-aminobutyric acid (GABA) B receptor, 2 // 9q22.1-q22.3 //	GABBR2	NM_005458	0.000334245	2.38308	cEDS up vs Normal	1.64047	3.46187	26.1992	4.34654	1.82494
8543	7940147	NM_001142703 // FAM111B // family with sequence similarity 111, member B // 11q12.1 //	FAM111B	NM_001142703	0.000793248	2.36181	cEDS up vs Normal	1.56239	3.57027	20.9558	4.25723	2.23468
15864	8013987	OTTHUMT00000448959 // RNY4P13 // RNA, Ro-associated Y4 pseudogene 13 // 17q11.2 // 1003	RNY4P13	OTTHUMT00000448959	0.00425409	2.33487	cEDS up vs Normal	1.38802	3.92762	12.878	4.14435	3.53998
29260	8145570	NM_001017420 // ESCO2 // establishment of sister chromatid cohesion N-acetyltransferase	ESCO2	NM_001017420	0.000878059	2.27565	cEDS up vs Normal	1.52424	3.39747	20.3926	3.89701	2.10209
26351	8117594	NM_003521 // HIST1H2BM // histone cluster 1, H2bm // 6p22.1 // 8342 /// ENST00000621112	HIST1H2BM	NM_003521	6.04947e-05	2.26102	cEDS up vs Normal	1.69832	3.01016	39.3688	3.83614	1.07185
11619	7970954	NM_001195415 // DCLK1 // doublecortin-like kinase 1 // 13q13 // 9201 /// NM_001195416 /	DCLK1	NM_001195415	0.00391795	2.25943	cEDS up vs Normal	1.3794	3.70091	13.2177	3.82953	3.18699
5249	7906919	NM_001102445 // RGS4 // regulator of G-protein signaling 4 // 1q23.3 // 5999 /// NM_001	RGS4	NM_001102445	0.007562	2.25315	cEDS up vs Normal	1.30258	3.89741	10.6455	3.8034	3.93006
16839	8023575	NM_133459 // CCBE1 // collagen and calcium binding EGF domains 1 // 18q21.32 // 147372	CCBE1	NM_133459	0.00246736	2.2383	cEDS up vs Normal	1.42086	3.52605	15.2269	3.74175	2.70306
21769	8072705	NM_014310 // RASD2 // RASD family, member 2 // 22q13.1 // 23551 /// XM_005261442 // RAS	RASD2	NM_014310	0.0016018	2.20876	cEDS up vs Normal	1.45165	3.36073	17.2672	3.61936	2.30569
10250	7956271	NM_003725 // HSD17B6 // hydroxysteroid (17-beta) dehydrogenase 6 // 12q13 // 8630 /// X	HSD17B6	NM_003725	0.0036779	2.20544	cEDS up vs Normal	1.37276	3.5432	13.4823	3.60563	2.94178
24405	8099302	NR_029511 // MIR95 // microRNA 95 // --- // 407052 /// ENST00000385072 // MIR95 // micr	MIR95	NR_029511	3.42753e-06	2.20456	cEDS up vs Normal	1.7989	2.70169	73.2121	3.60198	0.541192
15781	8013268	NR_026809 // FAM106A // family with sequence similarity 106, member A // 17p11.2 // 800	FAM106A	NR_026809	0.00803714	2.18274	cEDS up vs Normal	1.282	3.71634	10.423	3.51192	3.70634
18870	8043441	OTTHUMT00000323279 // IGKV1D-27 // immunoglobulin kappa variable 1D-27 (pseudogene) //	IGKV1D-27	OTTHUMT00000323279	1.67204e-05	2.17052	cEDS up vs Normal	1.71475	2.74742	52.3713	3.46157	0.727065
9220	7946589	NM_001098579 // MRVI1 // murine retrovirus integration site 1 homolog // 11p15 // 10335	MRVI1	NM_001098579	0.00163108	2.16538	cEDS up vs Normal	1.43665	3.26373	17.1783	3.44041	2.20304
24548	8100578	NM_001281765 // EPHA5 // EPH receptor A5 // 4q13.1 // 2044 /// NM_001281766 // EPHA5 //	EPHA5	NM_001281765	0.00287117	2.15506	cEDS up vs Normal	1.3837	3.35642	14.5491	3.39802	2.56911
31174	8163149	NM_001145368 // PTPN3 // protein tyrosine phosphatase, non-receptor type 3 // 9q31 // 5	PTPN3	NM_001145368	0.00577529	2.15089	cEDS up vs Normal	1.31291	3.52372	11.6614	3.38091	3.18916
15073	8005687	NR_026810 // FAM106CP // family with sequence similarity 106, member C, pseudogene // 1	FAM106CP	NR_026810	0.00964653	2.13169	cEDS up vs Normal	1.25104	3.63227	9.77176	3.30221	3.71727
8441	7939559	NM_130783 // TSPAN18 // tetraspanin 18 // 11p11.2 // 90139 /// XM_005253217 // TSPAN18	TSPAN18	NM_130783	0.00700539	2.11272	cEDS up vs Normal	1.284	3.47632	10.9284	3.22466	3.24579
8164	7937020	NM_001145966 // MKI67 // marker of proliferation Ki-67 // 10q26.2 // 4288 /// NM_002417	MKI67	NM_001145966	0.000980472	2.10521	cEDS up vs Normal	1.45664	3.04255	19.7927	3.19403	1.77511
17940	8034772	NM_018154 // ASF1B // anti-silencing function 1B histone chaperone // 19p13.12 // 55723	ASF1B	NM_018154	5.32693e-05	2.09849	cEDS up vs Normal	1.62408	2.71149	40.5233	3.16666	0.859585
17580	8031029	NR_030195 // MIR520B // microRNA 520b // --- // 574473 /// ENST00000384989 // MIR520B /	MIR520B	NR_030195	0.00236451	2.08696	cEDS up vs Normal	1.38176	3.15208	15.4208	3.11975	2.22539
24010	8095585	NM_001098484 // SLC4A4 // solute carrier family 4 (sodium bicarbonate cotransporter), m	SLC4A4	NM_001098484	0.00309704	2.07979	cEDS up vs Normal	1.35639	3.18899	14.2176	3.09063	2.39119
29097	8144036	NM_005431 // XRCC2 // X-ray repair complementing defective repair in Chinese hamster ce	XRCC2	NM_005431	0.000331095	2.064	cEDS up vs Normal	1.51197	2.81757	26.2613	3.02662	1.26775
5653	7911263	NM_001004690 // OR2M5 // olfactory receptor, family 2, subfamily M, member 5 // 1q44 //	OR2M5	NM_001004690	0.00545093	2.04982	cEDS up vs Normal	1.29632	3.24128	11.8861	2.9693	2.74796
32552	8175531	NM_004065 // CDR1 // cerebellar degeneration related protein 1 // Xq27.1 // 1038 /// EN	CDR1	NM_004065	0.00037456	2.04518	cEDS up vs Normal	1.49689	2.79432	25.4597	2.95062	1.27483
9779	7951686	NM_001243211 // IL18 // interleukin 18 // 11q23.1 // 3606 /// NM_001562 // IL18 // inte	IL18	NM_001243211	0.0100152	2.0439	cEDS up vs Normal	1.23136	3.39261	9.64074	2.94545	3.36074
18535	8040223	NM_001034 // RRM2 // ribonucleotide reductase M2 // 2p25-p24 // 6241 /// NM_001165931 /	RRM2	NM_001034	0.00130729	2.03438	cEDS up vs Normal	1.41148	2.93216	18.2848	2.90708	1.74888
19489	8049530	NM_001137550 // LRRFIP1 // leucine rich repeat (in FLII) interacting protein 1 // 2q37.	LRRFIP1	NM_001137550	0.000284972	2.02785	cEDS up vs Normal	1.50524	2.73191	27.261	2.88084	1.16244
8410	7939215	NM_012194 // KIAA1549L // KIAA1549-like // 11p13 // 25758 /// XM_005252847 // KIAA1549L	KIAA1549L	NM_012194	5.38052e-05	2.01499	cEDS up vs Normal	1.58107	2.568	40.4315	2.8292	0.769727
32554	8175539	NM_012317 // LDOC1 // leucine zipper, down-regulated in cancer 1 // Xq27 // 23641 /// E	LDOC1	NM_012317	0.000666935	2.01319	cEDS up vs Normal	1.4491	2.79687	21.9423	2.82202	1.41472
21614	8071212	NM_001178010 // CDC45 // cell division cycle 45 // 22q11.21 // 8318 /// NM_001178011 //	CDC45	NM_001178010	0.00042998	2.01092	cEDS up vs Normal	1.47474	2.74204	24.5842	2.81292	1.25862
13500	7989216	XR_916383 // LOC102724683 // uncharacterized LOC102724683 // --- // 102724683 /// XR_93	LOC102724683	XR_916383	3.25989e-05	2.00356	cEDS up vs Normal	1.59604	2.51513	45.2408	2.78345	0.676778
19373	8048171	NR_037701 // LINC01963 // LINC01963 - long intergenic non-protein coding RNA 1963 // 2q35 // 150967 /// ENST00000562038 // PKI55 // D	LINC01963	NR_037701	5.73913e-05	1.98444	cEDS up vs Normal	1.56263	2.52013	39.8436	2.70719	0.7474
20728	8062766	NM_001278610 // MYBL2 // v-myb avian myeloblastosis viral oncogene homolog-like 2 // 20	MYBL2	NM_001278610	0.000114225	1.98317	cEDS up vs Normal	1.53141	2.5682	33.9852	2.70213	0.874601
14644	8001197	NM_001201477 // NETO2 // neuropilin (NRP) and tolloid (TLL)-like 2 // 16q11 // 81831 //	NETO2	NM_001201477	0.000358512	1.9784	cEDS up vs Normal	1.47154	2.65985	25.7422	2.68316	1.14655
12365	7977933	NM_001267036 // SLC7A8 // solute carrier family 7 (amino acid transporter light chain,	SLC7A8	NM_001267036	0.00190042	1.96517	cEDS up vs Normal	1.36187	2.83574	16.4402	2.63064	1.76014
25149	8106278	ENST00000610426 // NSA2 // NSA2 ribosome biogenesis homolog // 5q13.3 // 10412 /// OTTH	NSA2	ENST00000610426	0.0010625	1.96423	cEDS up vs Normal	1.40134	2.75321	19.3635	2.62689	1.49229
7454	7929438	NM_001289067 // HELLS // helicase, lymphoid-specific // 10q24.2 // 3070 /// NM_00128906	HELLS	NM_001289067	0.000740635	1.9583	cEDS up vs Normal	1.42174	2.69735	21.3424	2.60342	1.34182
12964	7983306	NM_001167941 // WDR76 // WD repeat domain 76 // 15q15.3 // 79968 /// NM_024908 // WDR76	WDR76	NM_001167941	7.8934e-05	1.94544	cEDS up vs Normal	1.52931	2.4748	37.039	2.55263	0.758091
7493	7929816	NM_005063 // SCD // stearoyl-CoA desaturase (delta-9-desaturase) // 10q24.31 // 6319 //	SCD	NM_005063	0.0070326	1.93543	cEDS up vs Normal	1.24657	3.00496	10.9139	2.51323	2.53304
5979	7914667	NM_001281956 // CSMD2 // CUB and Sushi multiple domains 2 // 1p34.3 // 114784 /// NM_05	CSMD2	NM_001281956	0.00928369	1.93433	cEDS up vs Normal	1.21945	3.0683	9.90667	2.50889	2.78578
20541	8060813	NM_001281520 // MCM8 // minichromosome maintenance 8 homologous recombination repair fa	MCM8	NM_001281520	0.000101451	1.93143	cEDS up vs Normal	1.51159	2.46787	34.9428	2.49748	0.786207
20610	8061471	NM_021067 // GINS1 // GINS complex subunit 1 (Psf1 homolog) // 20p11.21 // 9837 /// XM_	GINS1	NM_021067	7.55812e-05	1.93106	cEDS up vs Normal	1.52389	2.44702	37.4114	2.49604	0.733906
24975	8104568	AY358688 // LOC100133299 // GALI1870 // 5p15.2 // 100133299	LOC100133299	AY358688	0.000148463	1.9252	cEDS up vs Normal	1.49172	2.48464	31.9405	2.47304	0.851692
12754	7981785	NR_028067 // OR4N3P // olfactory receptor, family 4, subfamily N, member 3 pseudogene /	OR4N3P	NR_028067	2.41698e-07	1.9165	cEDS up vs Normal	1.68598	2.17853	124.815	2.43894	0.214945
10710	7961293	NM_176887 // TAS2R46 // taste receptor, type 2, member 46 // 12p13.2 // 259292 /// ENST	TAS2R46	NM_176887	1.48921e-06	1.91311	cEDS up vs Normal	1.64133	2.22989	86.8401	2.42569	0.307261
29932	8151369	NM_153225 // SBSPON // somatomedin B and thrombospondin type 1 domain containing // 8q2	SBSPON	NM_153225	0.000767733	1.91145	cEDS up vs Normal	1.40175	2.60647	21.1394	2.4192	1.25884
5416	7908861	AF314543 // OCR1 // ovarian cancer-related protein 1 // 1q32.1 // 100128298	OCR1	AF314543	0.0075704	1.90622	cEDS up vs Normal	1.2335	2.94584	10.6414	2.3988	2.47963
28472	8138353	NM_005924 // MEOX2 // mesenchyme homeobox 2 // 7p22.1-p21.3 // 4223 /// ENST00000262041	MEOX2	NM_005924	0.00201426	1.90421	cEDS up vs Normal	1.33841	2.70919	16.1647	2.39093	1.62702
5425	7908966	NR_046213 // LINC00260 // long intergenic non-protein coding RNA 260 // 1q32.1 // 84719	LINC00260	NR_046213	1.2319e-05	1.90349	cEDS up vs Normal	1.57501	2.30049	55.9348	2.38816	0.46965
5367	7908347	NM_022375 // OCLM // oculomedin // 1q25 // 10896 /// ENST00000574641 // OCLM // oculome	OCLM	NM_022375	0.000225375	1.9025	cEDS up vs Normal	1.46193	2.47585	28.8808	2.38429	0.908119
5478	7909601	NR_004389 // SNORA16B // small nucleolar RNA, H/ACA box 16B // 1q32.3 // 692157 /// ENS	SNORA16B	NR_004389	8.07454e-06	1.89486	cEDS up vs Normal	1.58301	2.26815	61.2009	2.35455	0.423197
24044	8095907	NM_001166133 // FRAS1 // Fraser extracellular matrix complex subunit 1 // 4q21.21 // 80	FRAS1	NM_001166133	0.00255754	1.89446	cEDS up vs Normal	1.31866	2.72169	15.0646	2.35298	1.71812
25937	8113790	NM_178450 // MARCH3 // membrane associated ring finger 3 // 5q23.2 // 115123 /// XM_011	MARCH3	NM_178450	0.000534368	1.87199	cEDS up vs Normal	1.40607	2.49231	23.2494	2.26593	1.07208
30219	8154176	NR_029836 // MIR101-2 // microRNA 101-2 // 9p24.1 // 406894 /// uc003ziu.1 // MIR101-2	MIR101-2	NR_029836	2.05824e-07	1.8687	cEDS up vs Normal	1.65531	2.10959	128.814	2.25322	0.192412
13533	7989647	NM_001029989 // KIAA0101 // PCLAF - PCNA clamp associated factor // 15q22.31 // 9768 /// NM_014736 // KIAA0101 // K	PCLAF	NM_001029989	0.000445514	1.86702	cEDS up vs Normal	1.41331	2.46638	24.3626	2.24676	1.01444
16637	8021695	NM_152721 // DOK6 // docking protein 6 // 18q22.2 // 220164 /// XM_011525873 // DOK6 //	DOK6	NM_152721	0.00819852	1.86636	cEDS up vs Normal	1.21788	2.86015	10.3509	2.24422	2.38495
16723	8022500	NR_029662 // MIR1-2 // microRNA 1-2 // 18q11.2 // 406905 /// NR_110369 // MIR133A1HG //	MIR1-2	NR_029662	0.000581929	1.86561	cEDS up vs Normal	1.39902	2.48782	22.7402	2.24132	1.08419
23094	8086216	ENST00000469559 // ACAA1 // acetyl-CoA acyltransferase 1 // 3p22.2 // 30 /// AK127051 /	ACAA1	ENST00000469559	9.82624e-05	1.86455	cEDS up vs Normal	1.4798	2.34932	35.2042	2.23722	0.699047
20183	8056572	NM_020675 // SPC25 // SPC25, NDC80 kinetochore complex component // 2q31.1 // 57405 ///	SPC25	NM_020675	0.00245574	1.86133	cEDS up vs Normal	1.31141	2.64184	15.2483	2.22482	1.60497
12832	7982074	NR_003349 // SNORD115-34 // small nucleolar RNA, C/D box 115-34 // 15q11.2 // 100033808	SNORD115-34	NR_003349	3.8815e-08	1.85516	cEDS up vs Normal	1.67537	2.05425	178.038	2.20114	0.135996
25716	8112045	NM_001135604 // ESM1 // endothelial cell-specific molecule 1 // 5q11.2 // 11082 /// NM_	ESM1	NM_001135604	0.00325731	1.85376	cEDS up vs Normal	1.28935	2.66524	13.9993	2.19574	1.72531
14637	8001133	NM_024745 // SHCBP1 // SHC SH2-domain binding protein 1 // 16q11.2 // 79801 /// XM_0115	SHCBP1	NM_024745	0.00253346	1.85315	cEDS up vs Normal	1.30677	2.62797	15.1073	2.1934	1.59707
9264	7947110	NM_001256371 // E2F8 // E2F transcription factor 8 // 11p15.1 // 79733 /// NM_001256372	E2F8	NM_001256371	8.84162e-05	1.85233	cEDS up vs Normal	1.47781	2.32175	36.0796	2.19024	0.667765
8514	7939988	OTTHUMT00000391637 // OR5M4P // olfactory receptor, family 5, subfamily M, member 4 pse	OR5M4P	OTTHUMT00000391637	0.00523246	1.85091	cEDS up vs Normal	1.25264	2.73491	12.0466	2.1848	1.99499
5991	7914878	NM_001190481 // CLSPN // claspin // 1p34.2 // 63967 /// NM_022111 // CLSPN // claspin /	CLSPN	NM_001190481	0.00357681	1.84067	cEDS up vs Normal	1.27888	2.64925	13.5999	2.14563	1.73545
30855	8160392	NM_002173 // IFNA16 // interferon, alpha 16 // 9p22 // 3449 /// ENST00000380216 // IFNA	IFNA16	NM_002173	0.000385434	1.83547	cEDS up vs Normal	1.40696	2.39449	25.2763	2.12578	0.925117
29013	8143307	NM_001113239 // HIPK2 // homeodomain interacting protein kinase 2 // 7q34 // 28996 ///	HIPK2	NM_001113239	0.000248151	1.82836	cEDS up vs Normal	1.42384	2.34782	28.2078	2.09869	0.818413
8479	7939912	NM_024114 // TRIM48 // tripartite motif containing 48 // 11q11 // 79097 /// ENST0000041	TRIM48	NM_024114	0.000351099	1.82772	cEDS up vs Normal	1.40796	2.37262	25.8778	2.09624	0.891055
12835	7982080	NR_003352 // SNORD115-37 // small nucleolar RNA, C/D box 115-37 // 15q11.2 // 100033811	SNORD115-37	NR_003352	6.98852e-05	1.82729	cEDS up vs Normal	1.47381	2.26554	38.0912	2.0946	0.604881
29115	8144228	AK094159 // FLJ36840 // uncharacterized LOC645524 // --- // 645524	FLJ36840	AK094159	0.000366263	1.82546	cEDS up vs Normal	1.40502	2.37172	25.6039	2.08767	0.89691
28982	8142977	NR_029517 // MIR29B1 // microRNA 29b-1 // 7q32.3 // 407024 /// ENST00000385015 // MIR29	MIR29B1	NR_029517	0.000854511	1.82194	cEDS up vs Normal	1.36149	2.43811	20.5423	2.07428	1.11074
23983	8095395	NM_001074 // UGT2B7 // UDP glucuronosyltransferase 2 family, polypeptide B7 // 4q13 //	UGT2B7	NM_001074	0.000551481	1.82137	cEDS up vs Normal	1.38372	2.39744	23.0602	2.07212	0.988426
31433	8165866	NM_000351 // STS // steroid sulfatase (microsomal), isozyme S // Xp22.32 // 412 /// XM_	STS	NM_000351	0.000271397	1.82094	cEDS up vs Normal	1.41654	2.34079	27.5923	2.0705	0.825429
24560	8100734	NM_001077 // UGT2B17 // UDP glucuronosyltransferase 2 family, polypeptide B17 // 4q13 /	UGT2B17	NM_001077	0.00178283	1.82043	cEDS up vs Normal	1.31898	2.5125	16.7462	2.06854	1.35875
17958	8034940	NM_000435 // NOTCH3 // notch 3 // 19p13.2-p13.1 // 4854 /// XM_005259924 // NOTCH3 // n	NOTCH3	NM_000435	0.0043161	1.81893	cEDS up vs Normal	1.2592	2.62745	12.8188	2.06286	1.77017
24181	8097356	NM_001190799 // PLK4 // polo-like kinase 4 // 4q28 // 10733 /// NM_001190801 // PLK4 //	PLK4	NM_001190799	0.000191828	1.81716	cEDS up vs Normal	1.42961	2.30977	30.0345	2.05616	0.753059
11506	7969794	AY358798 // LOC100132099 // FRSS1829 // 13q32.3 // 100132099	LOC100132099	AY358798	0.00638851	1.80978	cEDS up vs Normal	1.22675	2.66989	11.275	2.02822	1.97876
13526	7989501	NM_001218 // CA12 // carbonic anhydrase XII // 15q22 // 771 /// NM_001293642 // CA12 //	CA12	NM_001218	0.00957886	1.8041	cEDS up vs Normal	1.1914	2.7319	9.79646	2.00679	2.25334
12801	7982012	NR_003295 // SNORD115-3 // small nucleolar RNA, C/D box 115-3 // 15q11.2 // 100033440 /	SNORD115-3	NR_003295	3.58233e-05	1.80298	cEDS up vs Normal	1.48368	2.191	44.3016	2.00259	0.49724
31951	8170257	XR_109780 // LOC645188 // uncharacterized LOC645188 // Xq27.2 // 645188 /// XR_172415 /	LOC645188	XR_109780	0.000705199	1.80293	cEDS up vs Normal	1.364	2.38311	21.6216	2.00238	1.01871
18938	8044021	NM_001282408 // IL1RL1 // interleukin 1 receptor-like 1 // 2q12 // 9173 /// NM_003856 /	IL1RL1	NM_001282408	0.00190965	1.79747	cEDS up vs Normal	1.30715	2.4717	16.4172	1.98183	1.32789
13827	7992682	NR_024492 // FLJ42627 // uncharacterized LOC645644 // 16p13.3 // 645644 /// AK124618 //	FLJ42627	NR_024492	0.00070792	1.79354	cEDS up vs Normal	1.36006	2.36517	21.5995	1.96705	1.00176
12457	7978846	NM_001197330 // POLE2 // polymerase (DNA directed), epsilon 2, accessory subunit // 14q	POLE2	NM_001197330	2.36509e-05	1.79135	cEDS up vs Normal	1.4901	2.15352	48.5595	1.95885	0.443732
8465	7939865	NM_001005470 // OR4B1 // olfactory receptor, family 4, subfamily B, member 1 // 11p11.2	OR4B1	NM_001005470	0.000164556	1.79014	cEDS up vs Normal	1.42293	2.25212	31.1643	1.95431	0.68981
12644	7980828	NM_001080414 // CCDC88C // coiled-coil domain containing 88C // 14q32.11 // 440193 ///	CCDC88C	NM_001080414	0.00234473	1.7848	cEDS up vs Normal	1.29048	2.46846	15.4592	1.9343	1.37635
11226	7966878	NM_001206999 // CIT // citron rho-interacting serine/threonine kinase // 12q24 // 11113	CIT	NM_001206999	0.00805296	1.78441	cEDS up vs Normal	1.20221	2.64854	10.4158	1.93283	2.04123
21479	8069880	NM_003253 // TIAM1 // T-cell lymphoma invasion and metastasis 1 // 21q22.11 // 7074 ///	TIAM1	NM_003253	0.00873574	1.78284	cEDS up vs Normal	1.19508	2.65967	10.1228	1.92699	2.09398
30087	8152617	NM_005328 // HAS2 // hyaluronan synthase 2 // 8q24.12 // 3037 /// XM_011517000 // HAS2	HAS2	NM_005328	0.00631757	1.78102	cEDS up vs Normal	1.22087	2.59818	11.3173	1.92017	1.86633
6212	7917082	NM_080868 // ASB17 // ankyrin repeat and SOCS box containing 17 // 1p31.1 // 127247 ///	ASB17	NM_080868	3.33547e-06	1.78091	cEDS up vs Normal	1.53585	2.06506	73.6253	1.91976	0.286822
18885	8043487	NR_027714 // ACTR3BP2 // ACTR3B pseudogene 2 // 2p11.1 // 440888 /// NR_045000 // ACTR3	ACTR3BP2	NR_027714	5.40061e-07	1.78011	cEDS up vs Normal	1.57407	2.01312	106.468	1.91678	0.198036
21285	8068057	NR_026552 // LINC00161 // long intergenic non-protein coding RNA 161 // 21q21.3 // 1184	LINC00161	NR_026552	0.000195446	1.7789	cEDS up vs Normal	1.41078	2.24307	29.899	1.91226	0.703531
9985	7953733	NM_001004328 // ZNF705A // zinc finger protein 705A // 12p13.31 // 440077 /// XM_011520	ZNF705A	NM_001004328	4.01667e-05	1.77888	cEDS up vs Normal	1.46678	2.15739	43.1836	1.91218	0.487083
9366	7948103	OTTHUMT00000334836 // OR4C50P // olfactory receptor, family 4, subfamily C, member 50 p	OR4C50P	OTTHUMT00000334836	0.00032032	1.777	cEDS up vs Normal	1.3896	2.2724	26.4795	1.90516	0.791436
10588	7960172	AY341951 // FAM138D // family with sequence similarity 138, member D // 12p13.33 // 677	FAM138D	AY341951	0.000235897	1.77597	cEDS up vs Normal	1.40186	2.2499	28.5604	1.90131	0.732289
32092	8171427	NM_004469 // VEGFD // VEGFD - vascular endothelial growth factor D	VEGFD	NM_004469	0.00511269	1.77081	cEDS up vs Normal	1.23421	2.54072	12.138	1.88213	1.70567
30447	8156090	NR_026851 // SPATA31D5P // SPATA31 subfamily D, member 5, pseudogene // 9q21.32 // 3471	SPATA31D5P	NR_026851	6.49278e-05	1.77068	cEDS up vs Normal	1.44674	2.16716	38.7385	1.88164	0.534303
7140	7926259	NM_018518 // MCM10 // minichromosome maintenance 10 replication initiation factor // 10	MCM10	NM_018518	0.00121578	1.76875	cEDS up vs Normal	1.32272	2.36518	18.6577	1.87445	1.10512
5381	7908492	NM_001201550 // CFHR4 // complement factor H-related 4 // 1q32 // 10877 /// NM_00120155	CFHR4	NM_001201550	0.00300135	1.76808	cEDS up vs Normal	1.26976	2.46198	14.3544	1.87196	1.43451
17101	8026300	NM_001025160 // ADGRE5 // adhesion G protein-coupled receptor E5 // 19p13.12 // 976 ///	ADGRE5	NM_001025160	1.83467e-06	1.76679	cEDS up vs Normal	1.54011	2.02683	83.2331	1.86716	0.246762
12242	7976818	NR_003198 // SNORD114-6 // small nucleolar RNA, C/D box 114-6 // 14q32 // 767582 /// EN	SNORD114-6	NR_003198	0.00168664	1.76589	cEDS up vs Normal	1.30373	2.39187	17.0148	1.86381	1.20495
20445	8059838	NM_001282962 // HJURP // Holliday junction recognition protein // 2q37.1 // 55355 /// N	HJURP	NM_001282962	5.16568e-05	1.76334	cEDS up vs Normal	1.45031	2.14394	40.8063	1.85437	0.499876
6363	7918753	XR_947718 // LOC105378913 // uncharacterized LOC105378913 // --- // 105378913 /// XR_95	LOC105378913	XR_947718	0.000784106	1.76065	cEDS up vs Normal	1.34195	2.30998	21.0208	1.84438	0.965148
27577	8129763	NM_001099286 // MTFR2 // mitochondrial fission regulator 2 // 6q23.3 // 113115 /// NM_1	MTFR2	NM_001099286	9.6365e-05	1.76039	cEDS up vs Normal	1.42793	2.17026	35.3646	1.84344	0.573394
12404	7978376	NM_001304476 // STXBP6 // syntaxin binding protein 6 (amisyn) // 14q12 // 29091 /// NM_	STXBP6	NM_001304476	0.000271834	1.75853	cEDS up vs Normal	1.38807	2.22788	27.5813	1.83657	0.73246
7224	7927097	NR_045000 // ACTR3BP5 // ACTR3B pseudogene 5 // 10p11.1 // 399746 /// uc021ppf.1 // ACT	ACTR3BP5	NR_045000	2.45934e-06	1.75839	cEDS up vs Normal	1.52821	2.02324	78.3925	1.83603	0.257631
19333	8047763	ENST00000272849 // NRP2 // neuropilin 2 // 2q33.3 // 8828 /// OTTHUMT00000256393 // NRP	NRP2	ENST00000272849	0.0066073	1.7572	cEDS up vs Normal	1.2118	2.54806	11.1476	1.83162	1.80736
24799	8102993	NM_001304382 // GYPB // glycophorin B (MNS blood group) // 4q31.21 // 2994 /// NM_00210	GYPB	NM_001304382	8.44931e-06	1.75472	cEDS up vs Normal	1.49682	2.05705	60.6157	1.82246	0.330725
19205	8046488	NM_031942 // CDCA7 // cell division cycle associated 7 // 2q31 // 83879 /// NM_145810 /	CDCA7	NM_031942	3.40503e-06	1.75428	cEDS up vs Normal	1.51828	2.02697	73.3118	1.82084	0.273206
16582	8021187	NM_001039535 // SKA1 // spindle and kinetochore associated complex subunit 1 // 18q21.1	SKA1	NM_001039535	0.0011864	1.74995	cEDS up vs Normal	1.31708	2.3251	18.7845	1.80487	1.05691
28209	8135902	NR_027330 // SND1-IT1 // SND1 intronic transcript 1 // 7q31 // 27099 /// XM_011516051 /	SND1-IT1	NR_027330	0.000241878	1.74758	cEDS up vs Normal	1.38766	2.20086	28.3856	1.79614	0.69604
12825	7982060	NR_003496 // SNORD115-27 // small nucleolar RNA, C/D box 115-27 // 15q11.2 // 100036564	SNORD115-27	NR_003496	5.25945e-07	1.74471	cEDS up vs Normal	1.54988	1.96403	107.031	1.78556	0.18351
29110	8144151	AK126609 // THAP5P1 // THAP domain containing 5 pseudogene 1 // 7q36.3 // 285872	THAP5P1	AK126609	0.000366611	1.73961	cEDS up vs Normal	1.36725	2.21337	25.5978	1.76683	0.759249
10678	7961069	NM_001253750 // CLECL1 // C-type lectin-like 1 // 12p13.31 // 160365 /// NM_001267701 /	CLECL1	NM_001253750	0.00278233	1.73829	cEDS up vs Normal	1.26538	2.38793	14.6881	1.76198	1.31956
8175	7937148	NR_030170 // MIR202 // microRNA 202 // 10q26.3 // 574448 /// NR_108078 // MIR202HG // M	MIR202	NR_030170	0.000344498	1.73821	cEDS up vs Normal	1.36919	2.20667	26.0015	1.76168	0.745285
12872	7982294	OTTHUMT00000430732 // ARHGAP11B // Rho GTPase activating protein 11B // 15q13.2 // 8983	ARHGAP11B	OTTHUMT00000430732	0.000164475	1.73676	cEDS up vs Normal	1.39709	2.15901	31.168	1.75637	0.61987
5611	7910997	NM_003686 // EXO1 // exonuclease 1 // 1q43 // 9156 /// NM_006027 // EXO1 // exonuclease	EXO1	NM_003686	0.000783019	1.73594	cEDS up vs Normal	1.33219	2.26206	21.0286	1.75339	0.917197
5250	7906930	NM_031423 // NUF2 // NUF2, NDC80 kinetochore complex component // 1q23.3 // 83540 /// N	NUF2	NM_031423	0.00269318	1.73371	cEDS up vs Normal	1.26592	2.37436	14.833	1.7452	1.29423
29345	8146357	NM_005914 // MCM4 // minichromosome maintenance complex component 4 // 8q11.2 // 4173 /	MCM4	NM_005914	0.00106946	1.7328	cEDS up vs Normal	1.31591	2.28178	19.3289	1.7419	0.99131
17317	8028286	NM_015073 // SIPA1L3 // signal-induced proliferation-associated 1 like 3 // 19q13.13 //	SIPA1L3	NM_015073	0.000347508	1.73213	cEDS up vs Normal	1.36612	2.1962	25.9447	1.73943	0.737479
23289	8088636	AY358705 // LOC100508226 // HHSL751 // --- // 100508226	LOC100508226	AY358705	0.00349404	1.73168	cEDS up vs Normal	1.24928	2.40036	13.6992	1.73781	1.3954
16208	8017344	AK123839 // LOC100129112 // uncharacterized LOC100129112 // 17q23.2 // 100129112	LOC100129112	AK123839	4.61543e-05	1.73021	cEDS up vs Normal	1.43581	2.08496	41.8571	1.73241	0.455275
30859	8160417	NM_021002 // IFNA6 // interferon, alpha 6 // 9p22 // 3443 /// ENST00000259555 // IFNA6	IFNA6	NM_021002	5.02771e-05	1.72616	cEDS up vs Normal	1.43101	2.08217	41.0569	1.71763	0.460189
14858	8003503	NM_000135 // FANCA // Fanconi anemia complementation group A // 16q24.3 // 2175 /// NM_	FANCA	NM_000135	0.000138342	1.72549	cEDS up vs Normal	1.39772	2.13012	32.4816	1.7152	0.580858
32244	8173005	NR_029513 // MIR98 // microRNA 98 // Xp11.22 // 407054 /// ENST00000606724 // MIR98 //	MIR98	NR_029513	0.000467169	1.72529	cEDS up vs Normal	1.35082	2.20356	24.0684	1.71446	0.78356
6652	7921442	OTTHUMT00000090327 // OR10J2P // olfactory receptor, family 10, subfamily J, member 2 p	OR10J2P	OTTHUMT00000090327	0.00168075	1.72184	cEDS up vs Normal	1.28865	2.30066	17.0318	1.70192	1.09919
27971	8133233	NM_001127231 // AUTS2 // autism susceptibility candidate 2 // 7q11.22 // 26053 /// NM_0	AUTS2	NM_001127231	0.00374901	1.72015	cEDS up vs Normal	1.24148	2.38337	13.4018	1.69575	1.39184
32169	8172204	NM_000898 // MAOB // monoamine oxidase B // Xp11.23 // 4129 /// XM_005272607 // MAOB //	MAOB	NM_000898	3.62922e-05	1.71988	cEDS up vs Normal	1.43718	2.0582	44.1734	1.6948	0.422036
6101	7915951	AF251047 // LOC100128922 // connexin // 1p33 // 100128922	LOC100128922	AF251047	0.000969346	1.71774	cEDS up vs Normal	1.31491	2.24396	19.8542	1.68699	0.934659
23636	8092053	NM_020949 // SLC7A14 // solute carrier family 7, member 14 // 3q26.2 // 57709 /// ENST0	SLC7A14	NM_020949	0.00693212	1.7172	cEDS up vs Normal	1.19883	2.4597	10.9676	1.68504	1.69002
21768	8072687	NM_006739 // MCM5 // minichromosome maintenance complex component 5 // 22q13.1 // 4174	MCM5	NM_006739	0.000266073	1.71559	cEDS up vs Normal	1.36909	2.14979	27.7276	1.67921	0.666172
22807	8083415	NM_001086 // AADAC // arylacetamide deacetylase // 3q25.1 // 13 /// XM_005247104 // AAD	AADAC	NM_001086	0.00322971	1.71241	cEDS up vs Normal	1.24844	2.34882	14.036	1.6677	1.30698
10857	7962951	NM_003482 // KMT2D // lysine (K)-specific methyltransferase 2D // 12q13.12 // 8085 ///	KMT2D	NM_003482	2.15392e-06	1.70969	cEDS up vs Normal	1.49899	1.95001	80.551	1.65784	0.226394
23616	8091867	NM_000055 // BCHE // butyrylcholinesterase // 3q26.1-q26.2 // 590 /// XM_005247685 // B	BCHE	NM_000055	0.00390757	1.70944	cEDS up vs Normal	1.23579	2.36463	13.2288	1.65694	1.37778
18045	8035855	NM_138286 // ZNF681 // zinc finger protein 681 // 19p12 // 148213 /// ENST00000402377 /	ZNF681	NM_138286	0.000125233	1.70841	cEDS up vs Normal	1.39258	2.09587	33.2564	1.65322	0.546824
6149	7916506	NM_001004303 // FYB2 // FYB2 - FYN binding protein 2 // 1p32.2 // 199920 ///	FYB2	NM_001004303	2.97061e-05	1.70716	cEDS up vs Normal	1.43564	2.03004	46.182	1.64871	0.392704
12843	7982096	NR_003362 // SNORD115-48 // small nucleolar RNA, C/D box 115-48 // 15q11.2 // 100033822	SNORD115-48	NR_003362	0.0010899	1.70476	cEDS up vs Normal	1.30432	2.22813	19.2288	1.64002	0.938192
13234	7986068	NM_000057 // BLM // Bloom syndrome, RecQ helicase-like // 15q26.1 // 641 /// NM_0012872	BLM	NM_000057	0.00361973	1.70422	cEDS up vs Normal	1.23905	2.34403	13.5495	1.63809	1.32986
7699	7932160	NM_001282695 // FAM107B // family with sequence similarity 107, member B // 10p13 // 83	FAM107B	NM_001282695	0.000162222	1.70339	cEDS up vs Normal	1.38124	2.10066	31.2712	1.63508	0.575158
27052	8124394	NM_021062 // HIST1H2BB // histone cluster 1, H2bb // 6p21.3 // 3018 /// ENST00000615966	HIST1H2BB	NM_021062	0.00699762	1.7014	cEDS up vs Normal	1.19445	2.42353	10.9325	1.62794	1.63799
12823	7982056	NR_003342 // SNORD115-25 // small nucleolar RNA, C/D box 115-25 // 15q11.2 // 100033801	SNORD115-25	NR_003342	0.00330124	1.69775	cEDS up vs Normal	1.24271	2.3194	13.9417	1.61479	1.27407
8559	7940253	NM_139249 // MS4A6E // membrane-spanning 4-domains, subfamily A, member 6E // 11q12.2 /	MS4A6E	NM_139249	0.000463617	1.69455	cEDS up vs Normal	1.33781	2.14643	24.1156	1.60332	0.731333
4345	7898161	NM_024329 // EFHD2 // EF-hand domain family member D2 // 1p36.21 // 79180 /// XM_005246	EFHD2	NM_024329	9.16919e-05	1.69235	cEDS up vs Normal	1.39448	2.05386	35.7761	1.59542	0.490542
32304	8173506	NM_017669 // ERCC6L // excision repair cross-complementation group 6-like // Xq13.1 //	ERCC6L	NM_017669	0.000251148	1.68672	cEDS up vs Normal	1.35773	2.09542	28.1247	1.57527	0.616114
17582	8031035	NR_030212 // MIR516B1 // microRNA 516b-1 // 19q13.42 // 574490 /// uc021vap.1 // MIR516	MIR516B1	NR_030212	7.18223e-05	1.68614	cEDS up vs Normal	1.3987	2.03265	37.8529	1.5732	0.45717
29640	8149097	NM_005218 // DEFB1 // defensin, beta 1 // 8p23.1 // 1672 /// ENST00000297439 // DEFB1 /	DEFB1	NM_005218	0.000443044	1.68436	cEDS up vs Normal	1.33517	2.12489	24.3972	1.56686	0.706452
9914	7952986	NM_001184985 // WNK1 // WNK lysine deficient protein kinase 1 // 12p13.3 // 65125 /// N	WNK1	NM_001184985	0.000258007	1.68433	cEDS up vs Normal	1.35563	2.09273	27.9388	1.56674	0.616854
13216	7985873	NM_001308025 // TICRR // TOPBP1-interacting checkpoint and replication regulator // 15q	TICRR	NM_001308025	0.00100124	1.68361	cEDS up vs Normal	1.30015	2.18017	19.6802	1.56419	0.874285
12249	7976838	NR_029861 // MIR376C // microRNA 376c // 14q32.31 // 442913 /// uc010txn.1 // MIR376C /	MIR376C	NR_029861	0.000647071	1.67981	cEDS up vs Normal	1.31776	2.14133	22.1175	1.55063	0.771197
4938	7904131	NM_022836 // DCLRE1B // DNA cross-link repair 1B // 1p13.2 // 64858 /// XM_005271130 //	DCLRE1B	NM_022836	0.000103199	1.67857	cEDS up vs Normal	1.38362	2.03638	34.8036	1.5462	0.488691
12842	7982094	NR_003359 // SNORD115-44 // small nucleolar RNA, C/D box 115-44 // 15q11.2 // 100033818	SNORD115-44	NR_003359	0.00421566	1.67855	cEDS up vs Normal	1.22229	2.30512	12.9152	1.54614	1.31686
9518	7949364	NM_080668 // CDCA5 // cell division cycle associated 5 // 11q12.1 // 113130 /// XM_0052	CDCA5	NM_080668	0.000241164	1.67625	cEDS up vs Normal	1.35424	2.07483	28.4062	1.53798	0.595566
24129	8096830	NM_006583 // RRH // retinal pigment epithelium-derived rhodopsin homolog // 4q25 // 106	RRH	NM_006583	0.000384798	1.6751	cEDS up vs Normal	1.33653	2.09943	25.2869	1.53388	0.667251
24246	8097867	NM_001131007 // TMEM131L // TMEM131L - transmembrane 131 like // 4q31.3 // 23240 /// NM_015196 // KIAA0922 // KI	TMEM131L	NM_001131007	7.77245e-05	1.67451	cEDS up vs Normal	1.39015	2.01703	37.1712	1.53179	0.4533
12923	7982792	NM_001164269 // RAD51 // RAD51 recombinase // 15q15.1 // 5888 /// NM_001164270 // RAD51	RAD51	NM_001164269	0.000131094	1.67348	cEDS up vs Normal	1.37344	2.03906	32.8987	1.52813	0.510945
12828	7982066	NR_001291 // SNORD115-1 // small nucleolar RNA, C/D box 115-1 // 15q11.2 // 338433 ///	SNORD115-1	NR_001291	0.000273745	1.67298	cEDS up vs Normal	1.34818	2.07604	27.5336	1.52638	0.609806
7419	7928994	NM_001080518 // LIPK // lipase, family member K // 10q23.31 // 643414 /// XM_011540072	LIPK	NM_001080518	0.00132617	1.67279	cEDS up vs Normal	1.28292	2.18113	18.2117	1.52569	0.921526
16442	8019842	NM_001071 // TYMS // thymidylate synthetase // 18p11.32 // 7298 /// ENST00000323224 //	TYMS	NM_001071	0.000182354	1.6727	cEDS up vs Normal	1.36219	2.054	30.4042	1.52539	0.551873
29962	8151559	NM_001010893 // SLC10A5 // solute carrier family 10, member 5 // 8q21.13 // 347051 ///	SLC10A5	NM_001010893	4.18885e-05	1.67048	cEDS up vs Normal	1.40557	1.98532	42.7794	1.51752	0.390205
15137	8006187	NM_024857 // ATAD5 // ATPase family, AAA domain containing 5 // 17q11.2 // 79915 /// XM	ATAD5	NM_024857	0.000657069	1.67008	cEDS up vs Normal	1.31306	2.12417	22.0285	1.51608	0.757059
12489	7979307	NM_001146015 // DLGAP5 // discs, large (Drosophila) homolog-associated protein 5 // 14q	DLGAP5	NM_001146015	0.00663801	1.66874	cEDS up vs Normal	1.19034	2.3394	11.1302	1.51134	1.49366
22485	8080100	NM_015106 // RAD54L2 // RAD54-like 2 (S. cerevisiae) // 3p21.2 // 23132 /// XM_00671306	RAD54L2	NM_015106	5.25717e-05	1.66523	cEDS up vs Normal	1.39641	1.9858	40.6445	1.49895	0.405674
28694	8139943	NR_003666 // SPDYE7P // speedy/RINGO cell cycle regulator family member E7, pseudogene	SPDYE7P	NR_003666	4.25764e-05	1.6648	cEDS up vs Normal	1.40196	1.97691	42.6233	1.49741	0.386444
19902	8053741	NR_003366 // ANKRD20A8P // ankyrin repeat domain 20 family, member A8, pseudogene // 2q	ANKRD20A8P	NR_003366	0.00029226	1.66403	cEDS up vs Normal	1.34165	2.06387	27.0908	1.49471	0.606913
13070	7984364	NM_001145102 // SMAD3 // SMAD family member 3 // 15q22.33 // 4088 /// NM_001145103 // S	SMAD3	NM_001145102	3.80749e-07	1.66376	cEDS up vs Normal	1.49809	1.84775	114.116	1.49375	0.143987
18498	8039892	NM_014513 // KIR2DS5 // killer cell immunoglobulin-like receptor, two domains, short cy	KIR2DS5	NM_014513	0.000149456	1.66214	cEDS up vs Normal	1.36352	2.02616	31.8898	1.48805	0.513283
19936	8054075	NM_001143975 // UBTFL1 // upstream binding transcription factor, RNA polymerase I-like	UBTFL1	NM_001143975	0.000219443	1.66185	cEDS up vs Normal	1.35064	2.04476	29.0694	1.48703	0.562697
18664	8041582	NM_138370 // PKDCC // protein kinase domain containing, cytoplasmic // 2p21 // 91461 //	PKDCC	NM_138370	0.00409648	1.66031	cEDS up vs Normal	1.21884	2.26167	13.0332	1.48159	1.25047
22520	8080714	NM_001164317 // FLNB // filamin B, beta // 3p14.3 // 2317 /// NM_001164318 // FLNB // f	FLNB	NM_001164317	0.0024956	1.65817	cEDS up vs Normal	1.24606	2.20659	15.1753	1.47409	1.06851
13083	7984540	NM_001281301 // KIF23 // kinesin family member 23 // 15q23 // 9493 /// NM_004856 // KIF	KIF23	NM_001281301	0.00317239	1.65787	cEDS up vs Normal	1.23288	2.22935	14.1133	1.47301	1.14807
23649	8092177	NM_001146276 // NCEH1 // neutral cholesterol ester hydrolase 1 // 3q26.31 // 57552 ///	NCEH1	NM_001146276	0.00028009	1.65651	cEDS up vs Normal	1.33965	2.04832	27.378	1.46824	0.589914
11876	7973110	NM_002934 // RNASE2 // ribonuclease, RNase A family, 2 (liver, eosinophil-derived neuro	RNASE2	NM_002934	1.37969e-05	1.65568	cEDS up vs Normal	1.42477	1.92402	54.5899	1.46534	0.295269
8804	7942832	NM_145018 // DDIAS // DNA damage-induced apoptosis suppressor // 11q14.1 // 220042 ///	DDIAS	NM_145018	0.000560944	1.64836	cEDS up vs Normal	1.31023	2.07375	22.9585	1.43969	0.689789
23861	8094278	NM_022346 // NCAPG // non-SMC condensin I complex subunit G // 4p15.33 // 64151 /// NR_	NCAPG	NM_022346	0.00191081	1.64799	cEDS up vs Normal	1.2563	2.16182	16.4143	1.43841	0.963947
16971	8024900	NM_001048201 // UHRF1 // ubiquitin-like with PHD and ring finger domains 1 // 19p13.3 /	UHRF1	NM_001048201	0.00135259	1.64798	cEDS up vs Normal	1.27277	2.1338	18.1115	1.43834	0.873573
7418	7928982	NM_001198828 // LIPF // lipase, gastric // 10q23.31 // 8513 /// NM_001198829 // LIPF //	LIPF	NM_001198828	0.00153592	1.6476	cEDS up vs Normal	1.2667	2.14303	17.4744	1.43703	0.904598
16405	8019622	NM_001291586 // TMEM106A // transmembrane protein 106A // 17q21.31 // 113277 /// NM_001	TMEM106A	NM_001291586	0.000471705	1.64718	cEDS up vs Normal	1.31638	2.0611	24.0089	1.43556	0.657721
4898	7903717	NR_029583 // MIR197 // microRNA 197 // 1p13.3 // 406974 /// ENST00000369851 // GNAI3 //	MIR197	NR_029583	3.54657e-05	1.64705	cEDS up vs Normal	1.39678	1.94217	44.4007	1.43511	0.35554
26126	8115732	AY358216 // LOC100133106 // VCEW9374 // 5q35.1 // 100133106	LOC100133106	AY358216	0.00690116	1.64649	cEDS up vs Normal	1.18234	2.29285	10.9843	1.43315	1.4352
10763	7961844	NM_001082972 // CASC1 // cancer susceptibility candidate 1 // 12p12.1 // 55259 /// NM_0	CASC1	NM_001082972	1.28807e-05	1.64644	cEDS up vs Normal	1.42074	1.908	55.4022	1.43298	0.284515
5958	7914467	NM_001281987 // SPOCD1 // SPOC domain containing 1 // 1p35.2 // 90853 /// NM_001281988	SPOCD1	NM_001281987	0.000483865	1.64604	cEDS up vs Normal	1.31492	2.06054	23.8525	1.43157	0.660193
13664	7991047	ENST00000619240 // HOMER2 // homer scaffolding protein 2 // 15q24.3 // 9455	HOMER2	ENST00000619240	0.00210387	1.6454	cEDS up vs Normal	1.25061	2.16482	15.9606	1.42936	0.985114
23764	8093294	NM_001123041 // CCR2 // chemokine (C-C motif) receptor 2 // 3p21.31 // 729230 /// NM_00	CCR2	NM_001123041	3.82793e-06	1.64406	cEDS up vs Normal	1.44457	1.8711	71.5561	1.42467	0.219008
31673	8167998	NM_000044 // AR // androgen receptor // Xq12 // 367 /// NM_001011645 // AR // androgen	AR	NM_000044	0.00554706	1.64335	cEDS up vs Normal	1.19566	2.25865	11.8178	1.42219	1.32377
15351	8008237	NM_002204 // ITGA3 // integrin alpha 3 // 17q21.33 // 3675 /// XM_005257308 // ITGA3 //	ITGA3	NM_002204	0.000675756	1.64225	cEDS up vs Normal	1.30027	2.07415	21.8665	1.41835	0.713508
7768	7932864	NM_183058 // LYZL2 // lysozyme-like 2 // 10p11.23 // 119180 /// XM_011519306 // LYZL2 /	LYZL2	NM_183058	2.11048e-05	1.63937	cEDS up vs Normal	1.40511	1.91268	49.785	1.40834	0.311172
25207	8106923	NM_005654 // NR2F1 // nuclear receptor subfamily 2, group F, member 1 // 5q14 // 7025 /	NR2F1	NM_005654	0.00247611	1.63546	cEDS up vs Normal	1.23901	2.15877	15.2109	1.39479	1.00866
16323	8018849	NM_003258 // TK1 // thymidine kinase 1, soluble // 17q23.2-q25.3 // 7083 /// ENST000003	TK1	NM_003258	0.000649628	1.63465	cEDS up vs Normal	1.29864	2.05759	22.0946	1.39197	0.693003
7145	7926330	NM_001080836 // MEIG1 // meiosis/spermiogenesis associated 1 // 10p13 // 644890 /// XM_	MEIG1	NM_001080836	0.00266589	1.63358	cEDS up vs Normal	1.23458	2.16152	14.8784	1.38826	1.02637
13966	7994109	NM_005030 // PLK1 // polo-like kinase 1 // 16p12.2 // 5347 /// ENST00000300093 // PLK1	PLK1	NM_005030	0.0025934	1.63295	cEDS up vs Normal	1.23581	2.15773	15.002	1.3861	1.01634
29249	8145418	NM_152562 // CDCA2 // cell division cycle associated 2 // 8p21.2 // 157313 /// XM_00527	CDCA2	NM_152562	0.000195857	1.63254	cEDS up vs Normal	1.34017	1.98869	29.8838	1.38466	0.509684
9399	7948229	NM_001278201 // SLC43A3 // solute carrier family 43, member 3 // 11q11 // 29015 /// NM_	SLC43A3	NM_001278201	0.00105267	1.63051	cEDS up vs Normal	1.2772	2.08156	19.4128	1.37764	0.78062
21131	8066569	NM_147197 // WFDC11 // WAP four-disulfide core domain 11 // 20q13.12 // 259239 /// ENST	WFDC11	NM_147197	8.56231e-05	1.62925	cEDS up vs Normal	1.36332	1.94705	36.349	1.37329	0.415589
30709	8158862	NR_002914 // SNORD62A // small nucleolar RNA, C/D box 62A // 9q34.13 // 26786 /// NR_00	SNORD62A	NR_002914	0.000246015	1.62695	cEDS up vs Normal	1.33006	1.9901	28.2677	1.36533	0.5313
32527	8175332	XM_011509022 // SAGE2P // sarcoma antigen 2, pseudogene // Xq26.3 // 644717 /// XM_0115	SAGE2P	XM_011509022	0.000261006	1.62537	cEDS up vs Normal	1.32735	1.99029	27.8594	1.35989	0.53694
24668	8101780	NM_014485 // HPGDS // hematopoietic prostaglandin D synthase // 4q22.3 // 27306 /// XM_	HPGDS	NM_014485	0.00108563	1.62512	cEDS up vs Normal	1.27378	2.07338	19.2495	1.35905	0.776617
31500	8166509	NM_001136234 // SUPT20HL1 // SPT20 homolog, SAGA complex component-like 1 // Xp22.11 //	SUPT20HL1	NM_001136234	0.00488587	1.6244	cEDS up vs Normal	1.1983	2.20201	12.3182	1.35655	1.21138
16050	8015802	AK127427 // LINC00910 // long intergenic non-protein coding RNA 910 // 17q21.31 // 1001	LINC00910	AK127427	1.44692e-05	1.62291	cEDS up vs Normal	1.40387	1.87612	54.0334	1.35143	0.275121
6961	7924619	NM_001008493 // ENAH // enabled homolog (Drosophila) // 1q42.12 // 55740 /// NM_018212	ENAH	NM_001008493	0.000254711	1.61929	cEDS up vs Normal	1.32526	1.97857	28.0274	1.33901	0.525525
16661	8021946	NM_130386 // COLEC12 // collectin sub-family member 12 // 18p11.32 // 81035 /// XM_0115	COLEC12	NM_130386	0.00293433	1.61918	cEDS up vs Normal	1.22497	2.14024	14.4534	1.33861	1.01877
18731	8042283	NM_014181 // LGALSL // lectin, galactoside-binding-like // 2p14 // 29094 /// ENST000002	LGALSL	NM_014181	0.00192534	1.6191	cEDS up vs Normal	1.24583	2.1042	16.3783	1.33834	0.898859
31779	8168794	NM_006733 // CENPI // centromere protein I // Xq22.1 // 2491 /// XM_005262111 // CENPI	CENPI	NM_006733	0.00401225	1.61853	cEDS up vs Normal	1.20794	2.16869	13.119	1.3364	1.12054
31110	8162533	NM_000264 // PTCH1 // patched 1 // 9q22.3 // 5727 /// NM_001083602 // PTCH1 // patched	PTCH1	NM_000264	1.03964e-05	1.61795	cEDS up vs Normal	1.40791	1.85933	58.0015	1.33441	0.253072
11017	7964687	NM_001099676 // C12orf56 // chromosome 12 open reading frame 56 // 12q14.2 // 115749 //	C12orf56	NM_001099676	0.000152435	1.61523	cEDS up vs Normal	1.33932	1.94799	31.74	1.3251	0.459233
11721	7971866	NM_001042517 // DIAPH3 // diaphanous-related formin 3 // 13q21.2 // 81624 /// NM_001258	DIAPH3	NM_001042517	0.00364785	1.61318	cEDS up vs Normal	1.21158	2.1479	13.5168	1.31808	1.07265
10600	7960340	NM_001243088 // FOXM1 // forkhead box M1 // 12p13 // 2305 /// NM_001243089 // FOXM1 //	FOXM1	NM_001243088	0.000464067	1.61291	cEDS up vs Normal	1.30181	1.99834	24.1096	1.31714	0.600945
7488	7929750	NM_020354 // ENTPD7 // ectonucleoside triphosphate diphosphohydrolase 7 // --- // 57089	ENTPD7	NM_020354	0.00653555	1.61206	cEDS up vs Normal	1.1774	2.20717	11.1888	1.31423	1.29205
11664	7971373	NM_001286272 // TPT1 // tumor protein, translationally-controlled 1 // 13q14 // 7178 //	TPT1	NM_001286272	6.60943e-05	1.61147	cEDS up vs Normal	1.3608	1.90832	38.581	1.31224	0.374139
30096	8152668	NM_014109 // ATAD2 // ATPase family, AAA domain containing 2 // 8q24.13 // 29028 /// XM	ATAD2	NM_014109	0.00111929	1.61085	cEDS up vs Normal	1.26692	2.04815	19.0887	1.31012	0.754964
13040	7984077	NR_029709 // MIR190A // microRNA 190a // 15q22.2 // 406965 /// ENST00000388402 // MIR19	MIR190A	NR_029709	0.00026475	1.60997	cEDS up vs Normal	1.31955	1.96432	27.7617	1.30713	0.517922
12802	7982014	NR_003296 // SNORD115-4 // small nucleolar RNA, C/D box 115-4 // 15q11.2 // 100033441 /	SNORD115-4	NR_003296	1.04256e-06	1.60903	cEDS up vs Normal	1.44379	1.79319	93.331	1.30393	0.153681
10129	7955135	NR_029448 // TEX49 // TEX49 - testis expressed 49 // 12q13.12 // 255	TEX49	NR_029448	0.00145392	1.60609	cEDS up vs Normal	1.25391	2.0572	17.7476	1.29392	0.801976
22629	8081462	NM_032600 // CCDC54 // coiled-coil domain containing 54 // 3q13.12 // 84692 /// ENST000	CCDC54	NM_032600	2.97521e-05	1.60604	cEDS up vs Normal	1.37754	1.87244	46.1662	1.29374	0.308258
20086	8055426	NM_005915 // MCM6 // minichromosome maintenance complex component 6 // 2q21 // 4175 ///	MCM6	NM_005915	0.000199032	1.60383	cEDS up vs Normal	1.32555	1.94054	29.7676	1.28624	0.475303
13564	7989975	NM_017882 // CLN6 // ceroid-lipofuscinosis, neuronal 6, late infantile, variant // 15q2	CLN6	NM_017882	2.54871e-05	1.60276	cEDS up vs Normal	1.3792	1.86255	47.7687	1.28258	0.295349
13887	7993167	NM_001256160 // ATF7IP2 // activating transcription factor 7 interacting protein 2 // 1	ATF7IP2	NM_001256160	0.000310111	1.60143	cEDS up vs Normal	1.31035	1.95717	26.6943	1.27809	0.526668
9759	7951545	NM_001144763 // EXPH5 // exophilin 5 // 11q22.3 // 23086 /// NM_001144764 // EXPH5 // e	EXPH5	NM_001144763	0.00603813	1.59967	cEDS up vs Normal	1.1791	2.17025	11.49	1.27212	1.21786
21288	8068100	NR_027072 // LINC00189 // long intergenic non-protein coding RNA 189 // 21q22.11 // 193	LINC00189	NR_027072	9.67385e-05	1.59949	cEDS up vs Normal	1.34416	1.90332	35.3327	1.27153	0.395859
28513	8138706	OTTHUMT00000082070 // HMGB3P20 // high mobility group box 3 pseudogene 20 // 7p15.2 //	HMGB3P20	OTTHUMT00000082070	7.8081e-07	1.59943	cEDS up vs Normal	1.44154	1.77461	98.912	1.27131	0.141383
14827	8003171	NM_021149 // COTL1 // coactosin-like F-actin binding protein 1 // 16q24.1 // 23406 ///	COTL1	NM_021149	0.00300764	1.59928	cEDS up vs Normal	1.21736	2.10101	14.3453	1.2708	0.974452
13567	7990027	NR_026808 // ANP32A-IT1 // ANP32A intronic transcript 1 // 15q23 // 80035	ANP32A-IT1	NR_026808	0.00104801	1.59917	cEDS up vs Normal	1.26504	2.02157	19.4364	1.27044	0.719005
28943	8142585	NM_001009571 // CADPS2 // Ca++-dependent secretion activator 2 // 7q31.3 // 93664 /// N	CADPS2	NM_001009571	0.000160371	1.59831	cEDS up vs Normal	1.32927	1.92181	31.3573	1.26752	0.444641
10711	7961295	NM_176884 // TAS2R43 // taste receptor, type 2, member 43 // 12p13.2 // 259289 /// ENST	TAS2R43	NM_176884	0.00482605	1.5976	cEDS up vs Normal	1.19159	2.14196	12.3675	1.26513	1.12524
28789	8140984	NM_001039372 // HEPACAM2 // HEPACAM family member 2 // 7q21.3 // 253012 /// NM_00128880	HEPACAM2	NM_001039372	0.00138544	1.59631	cEDS up vs Normal	1.25232	2.03479	17.9901	1.26077	0.770895
28878	8141843	NM_001079877 // RASA4 // RAS p21 protein activator 4 // 7q22 // 10156 /// NM_006989 //	RASA4	NM_001079877	0.00756625	1.59502	cEDS up vs Normal	1.16405	2.18555	10.6434	1.25641	1.2985
30133	8153067	NR_029599 // MIR30D // microRNA 30d // 8q24.22 // 407033 /// ENST00000362283 // MIR30D	MIR30D	NR_029599	2.61961e-06	1.59462	cEDS up vs Normal	1.4189	1.7921	77.383	1.25506	0.178407
13300	7986637	XR_916082 // IGHV1OR15-1 // immunoglobulin heavy variable 1/OR15-1 (non-functional) //	IGHV1OR15-1	XR_916082	0.00101353	1.59427	cEDS up vs Normal	1.26443	2.01015	19.6148	1.25389	0.703182
8378	7938834	NM_001111018 // NAV2 // neuron navigator 2 // 11p15.1 // 89797 /// NM_001111019 // NAV2	NAV2	NM_001111018	0.00761286	1.5942	cEDS up vs Normal	1.16347	2.18441	10.6209	1.25365	1.29839
10000	7953892	NM_001291822 // KLRF1 // killer cell lectin-like receptor subfamily F, member 1 // 12p1	KLRF1	NM_001291822	0.00359612	1.59322	cEDS up vs Normal	1.20629	2.10427	13.5771	1.25035	1.01301
31153	8162936	NM_001004481 // OR13C2 // olfactory receptor, family 13, subfamily C, member 2 // 9q31.	OR13C2	NM_001004481	0.00132304	1.59068	cEDS up vs Normal	1.25213	2.02077	18.2238	1.2418	0.749557
30337	8155214	NM_001256685 // MELK // maternal embryonic leucine zipper kinase // 9p13.2 // 9833 ///	MELK	NM_001256685	0.00474199	1.58984	cEDS up vs Normal	1.1904	2.12331	12.4378	1.23895	1.09573
27318	8126931	NM_001166478 // DEFB133 // defensin, beta 133 // 6p12.3 // 403339 /// ENST00000398721 /	DEFB133	NM_001166478	5.54403e-05	1.58792	cEDS up vs Normal	1.35231	1.86457	40.1578	1.2325	0.337605
15848	8013786	NR_029685 // MIR144 // microRNA 144 // 17q11.2 // 406936 /// uc010waz.1 // MIR144 // mi	MIR144	NR_029685	1.67279e-06	1.58565	cEDS up vs Normal	1.42023	1.77033	84.8133	1.22489	0.158864
11372	7968563	NM_002915 // RFC3 // replication factor C subunit 3 // 13q13.2 // 5983 /// NM_181558 //	RFC3	NM_002915	0.000454833	1.5825	cEDS up vs Normal	1.28889	1.94299	24.234	1.21435	0.551202
27368	8127498	NR_029598 // MIR30C2 // microRNA 30c-2 // 6q13 // 407032 /// uc011dya.2 // MIR30C2 // m	MIR30C2	NR_029598	0.000233394	1.5819	cEDS up vs Normal	1.30995	1.91031	28.635	1.21235	0.465717
9933	7953218	NM_001130862 // RAD51AP1 // RAD51 associated protein 1 // 12p13.2-p13.1 // 10635 /// NM	RAD51AP1	NM_001130862	0.00584689	1.58133	cEDS up vs Normal	1.17621	2.12598	11.6138	1.21043	1.14645
24570	8100791	NM_001105677 // UGT2A2 // UDP glucuronosyltransferase 2 family, polypeptide A2 // 4q13.	UGT2A2	NM_001105677	2.84971e-06	1.581	cEDS up vs Normal	1.4084	1.77476	76.0546	1.20935	0.174912
6099	7915926	NM_001048166 // STIL // SCL/TAL1 interrupting locus // 1p32 // 6491 /// NM_001282936 //	STIL	NM_001048166	0.000558284	1.58028	cEDS up vs Normal	1.28086	1.9497	22.9869	1.20694	0.577563
28321	8136954	NM_001130025 // TCAF2 // TRPM8 channel-associated factor 2 // 7q35 // 285966 /// NM_001	TCAF2	NM_001130025	0.00111567	1.57907	cEDS up vs Normal	1.25458	1.9875	19.1057	1.20291	0.69257
32706	8176753	NM_001006121 // RBMY1B // RNA binding motif protein, Y-linked, family 1, member B // Yq	RBMY1B	NM_001006121	5.4438e-05	1.57736	cEDS up vs Normal	1.34687	1.84728	40.3244	1.19719	0.326579
23863	8094340	NR_029631 // MIR218-1 // microRNA 218-1 // 4p15.31 // 407000 /// ENST00000384999 // MIR	MIR218-1	NR_029631	0.00440084	1.57682	cEDS up vs Normal	1.19075	2.08808	12.7396	1.19541	1.03218
18903	8043602	NM_001281710 // NCAPH // non-SMC condensin I complex subunit H // 2q11.2 // 23397 /// N	NCAPH	NM_001281710	0.00666737	1.57563	cEDS up vs Normal	1.16705	2.12725	11.1136	1.19145	1.17927
25290	8107702	NM_207408 // TEX43 // testis expressed 43 // 5q23.2 // 389320 /// ENST00000357147 // TE	TEX43	NM_207408	0.0079067	1.57539	cEDS up vs Normal	1.15665	2.14571	10.4825	1.19063	1.24941
21430	8069541	NM_001256370 // SAMSN1 // SAM domain, SH3 domain and nuclear localization signals 1 //	SAMSN1	NM_001256370	9.45413e-05	1.57509	cEDS up vs Normal	1.33181	1.86282	35.5223	1.18966	0.368396
32986	8179228	NM_001077511 // TCF19 // transcription factor 19 // 6p21.3 // 6941 /// NM_007109 // TCF	TCF19	NM_001077511	0.00159249	1.57479	cEDS up vs Normal	1.23836	2.00263	17.2959	1.18866	0.755974
10527	7959361	NM_014938 // MLXIP // MLX interacting protein // 12q24.31 // 22877 /// XM_006719290 //	MLXIP	NM_014938	3.63501e-06	1.5745	cEDS up vs Normal	1.39998	1.77078	72.327	1.18768	0.180631
29911	8151215	OTTHUMT00000351506 // RPS15AP25 // ribosomal protein S15a pseudogene 25 // 8q13.2 // 72	RPS15AP25	OTTHUMT00000351506	0.00173194	1.57434	cEDS up vs Normal	1.23461	2.00756	16.8861	1.18715	0.773342
19934	8054054	NM_001164315 // ANKRD36 // ankyrin repeat domain 36 // 2q11.2 // 375248 /// XM_00671251	ANKRD36	NM_001164315	0.00147877	1.57352	cEDS up vs Normal	1.24099	1.99515	17.6629	1.18443	0.737631
12913	7982663	NM_001128628 // PAK6 // p21 protein (Cdc42/Rac)-activated kinase 6 // 15q14 // 56924 //	PAK6	NM_001128628	0.00508226	1.57261	cEDS up vs Normal	1.18175	2.09273	12.1616	1.18139	1.06856
9378	7948127	NM_001005199 // OR8H1 // olfactory receptor, family 8, subfamily H, member 1 // 11q12.1	OR8H1	NM_001005199	0.00284693	1.57258	cEDS up vs Normal	1.21145	2.04136	14.5865	1.18131	0.890854
31850	8169419	NM_001099922 // ALG13 // ALG13, UDP-N-acetylglucosaminyltransferase subunit // Xq23 //	ALG13	NM_001099922	6.24074e-06	1.57102	cEDS up vs Normal	1.38825	1.77787	64.6171	1.17615	0.20022
27087	8124549	OTTHUMT00000040175 // OR2B8P // olfactory receptor, family 2, subfamily B, member 8 pse	OR2B8P	OTTHUMT00000040175	0.000280881	1.57068	cEDS up vs Normal	1.2989	1.89933	27.3589	1.17502	0.472432
26613	8120271	ENST00000474457 // FBXO9 // F-box protein 9 // 6p12.3-p11.2 // 26268 /// AK095307 // FB	FBXO9	ENST00000474457	0.00719835	1.57021	cEDS up vs Normal	1.16114	2.12341	10.8274	1.17346	1.19217
25925	8113717	NR_051996 // MGC32805 // uncharacterized LOC153163 // 5q23.2 // 153163 /// ENST00000503	MGC32805	NR_051996	0.000264053	1.56899	cEDS up vs Normal	1.29996	1.8937	27.7798	1.16942	0.463058
11072	7965206	NM_001146335 // SLC6A15 // solute carrier family 6 (neutral amino acid transporter), me	SLC6A15	NM_001146335	0.000699492	1.56823	cEDS up vs Normal	1.26769	1.94001	21.6681	1.16689	0.592382
19846	8053341	NM_002580 // REG3A // regenerating islet-derived 3 alpha // 2p12 // 5068 /// NM_138937	REG3A	NM_002580	0.0027205	1.56443	cEDS up vs Normal	1.21092	2.02113	14.788	1.15433	0.858648
12488	7979281	NM_001008396 // WDHD1 // WD repeat and HMG-box DNA binding protein 1 // 14q22.2 // 1116	WDHD1	NM_001008396	0.00138157	1.56373	cEDS up vs Normal	1.24007	1.97187	18.0042	1.15205	0.703866
12813	7982036	NR_003307 // SNORD115-15 // small nucleolar RNA, C/D box 115-15 // 15q11.2 // 100033453	SNORD115-15	NR_003307	0.000404789	1.56329	cEDS up vs Normal	1.28399	1.90333	24.9645	1.15058	0.506973
9365	7948101	NM_001005512 // OR4A47 // olfactory receptor, family 4, subfamily A, member 47 // 11p11	OR4A47	NM_001005512	4.67558e-05	1.56291	cEDS up vs Normal	1.34234	1.81973	41.7352	1.14933	0.302925
27979	8133326	NM_001257190 // POM121 // POM121 transmembrane nucleoporin // 7q11.23 // 9883 /// NM_17	POM121	NM_001257190	0.00144268	1.56256	cEDS up vs Normal	1.23788	1.97242	17.7865	1.1482	0.710102
28176	8135512	ENST00000421043 // ZNF277 // zinc finger protein 277 // 7q31.1 // 11179 /// AK027128 //	ZNF277	ENST00000421043	0.00101035	1.5624	cEDS up vs Normal	1.25177	1.9501	19.6316	1.14764	0.643047
24034	8095806	NM_001130016 // ART3 // ADP-ribosyltransferase 3 // 4q21.1|4p15.1-p14 // 419 /// NM_001	ART3	NM_001130016	0.0027041	1.56045	cEDS up vs Normal	1.20988	2.01259	14.8149	1.14124	0.847368
17086	8026155	NM_052876 // NACC1 // nucleus accumbens associated 1, BEN and BTB (POZ) domain containi	NACC1	NM_052876	7.59119e-05	1.55981	cEDS up vs Normal	1.32911	1.83056	37.3738	1.13915	0.335278
12922	7982757	NM_144508 // KNL1 // KNL1 - kinetochore scaffold 1 // 15q14 // 57082 /// NM_170589	KNL1	NM_144508	0.00353659	1.5581	cEDS up vs Normal	1.19633	2.02926	13.6478	1.13351	0.913599
21246	8067834	XR_941705 // LOC102724148 // uncharacterized LOC102724148 // --- // 102724148 /// XR_94	LOC102724148	XR_941705	0.000494882	1.5581	cEDS up vs Normal	1.27511	1.90389	23.7148	1.13353	0.525782
29833	8150537	NM_001257180 // SLC20A2 // solute carrier family 20 (phosphate transporter), member 2 /	SLC20A2	NM_001257180	0.00115784	1.55719	cEDS up vs Normal	1.24449	1.94845	18.9114	1.13053	0.657582
18098	8036302	ENST00000412740 // LINC00665 // long intergenic non-protein coding RNA 665 // 19q13.12	LINC00665	ENST00000412740	0.00303493	1.55595	cEDS up vs Normal	1.20301	2.01242	14.3058	1.12646	0.866156
12395	7978285	NM_001198568 // ADCY4 // adenylate cyclase 4 // 14q12 // 196883 /// NM_001198592 // ADC	ADCY4	NM_001198568	0.0037357	1.55544	cEDS up vs Normal	1.19281	2.02831	13.4168	1.1248	0.922193
27051	8124391	NM_003513 // HIST1H2AB // histone cluster 1, H2ab // 6p22.2 // 8335 /// ENST00000615868	HIST1H2AB	NM_003513	0.000661462	1.55495	cEDS up vs Normal	1.26396	1.91293	21.9899	1.12319	0.56185
7869	7933707	NM_001005413 // ZWINT // ZW10 interacting kinetochore protein // 10q21-q22 // 11130 ///	ZWINT	NM_001005413	0.000294901	1.55395	cEDS up vs Normal	1.28942	1.87275	27.0304	1.11994	0.455757
31492	8166442	NM_001040020 // FAM3C // family with sequence similarity 3, member C // 7q31 // 10447 /	FAM3C	NM_001040020	4.0844e-05	1.55336	cEDS up vs Normal	1.33995	1.80076	43.0222	1.11801	0.285854
22145	8076292	NM_145174 // DNAJB7 // DnaJ (Hsp40) homolog, subfamily B, member 7 // 22q13.2 // 150353	DNAJB7	NM_145174	8.86616e-08	1.55231	cEDS up vs Normal	1.43503	1.67917	151.801	1.11457	0.0807652
6475	7919612	NM_001005464 // HIST2H3A // histone cluster 2, H3a // 1q21.2 // 333932 /// NM_001123375	HIST2H3A	NM_001005464	7.66508e-05	1.55203	cEDS up vs Normal	1.32463	1.81846	37.2905	1.11365	0.328504
31548	8166906	NM_001097579 // GPR34 // G protein-coupled receptor 34 // Xp11.4 // 2857 /// NM_005300	GPR34	NM_001097579	0.000125551	1.55146	cEDS up vs Normal	1.31196	1.83469	33.2365	1.11181	0.367966
31592	8167347	NM_001282166 // SUV39H1 // suppressor of variegation 3-9 homolog 1 (Drosophila) // Xp11	SUV39H1	NM_001282166	3.37421e-07	1.54929	cEDS up vs Normal	1.41717	1.69372	116.874	1.10472	0.103974
28233	8136115	NM_001134336 // STRIP2 // striatin interacting protein 2 // 7q32.1 // 57464 /// NM_0207	STRIP2	NM_001134336	0.000684051	1.54913	cEDS up vs Normal	1.2603	1.90416	21.7962	1.1042	0.557262
32193	8172399	NR_073393 // SSX9 // synovial sarcoma, X breakpoint 9 // Xp11.23 // 280660 /// ENST0000	SSX9	NR_073393	0.00016544	1.54866	cEDS up vs Normal	1.30321	1.84034	31.1243	1.10268	0.389712
28732	8140319	NM_001243198 // HIP1 // huntingtin interacting protein 1 // 7q11.23 // 3092 /// NM_0053	HIP1	NM_001243198	0.00210641	1.54803	cEDS up vs Normal	1.21676	1.96948	15.9549	1.10062	0.758817
23842	8094139	NM_001040448 // DEFB131A // defensin, beta 131A // 4p16.1 // 644414 /// AF529414 // DEFB1	DEFB131A	NM_001040448	0.000682176	1.5467	cEDS up vs Normal	1.25935	1.89963	21.812	1.0963	0.552875
20879	8064319	NM_001037732 // DEFB128 // defensin, beta 128 // 20p13 // 245939 /// ENST00000334391 //	DEFB128	NM_001037732	0.000242664	1.54642	cEDS up vs Normal	1.29146	1.8517	28.363	1.09538	0.42482
12838	7982086	NR_003355 // SNORD115-40 // small nucleolar RNA, C/D box 115-40 // 15q11.2 // 100033814	SNORD115-40	NR_003355	0.00435618	1.54638	cEDS up vs Normal	1.1824	2.02241	12.7811	1.09527	0.942636
23313	8088866	NM_020872 // CNTN3 // contactin 3 (plasmacytoma associated) // 3p12.3 // 5067 /// XM_00	CNTN3	NM_020872	0.00658681	1.54601	cEDS up vs Normal	1.16024	2.06005	11.1594	1.09405	1.07842
15162	8006459	NM_005408 // CCL13 // chemokine (C-C motif) ligand 13 // 17q11.2 // 6357 /// ENST000002	CCL13	NM_005408	0.00320035	1.54593	cEDS up vs Normal	1.19729	1.99609	14.0754	1.09379	0.854805
25483	8109649	NR_029701 // MIR146A // microRNA 146a // 5q34 // 406938 /// ENST00000385201 // MIR146A	MIR146A	NR_029701	0.00209512	1.54586	cEDS up vs Normal	1.21623	1.96484	15.98	1.09358	0.752773
29725	8149521	NM_004467 // FGL1 // fibrinogen like 1 // 8p22 // 2267 /// NM_147203 // FGL1 // fibrino	FGL1	NM_004467	0.000291722	1.54545	cEDS up vs Normal	1.28566	1.85772	27.1032	1.09223	0.443286
28640	8139772	NM_033273 // ZNF479 // zinc finger protein 479 // 7p11.2 // 90827 /// XM_005271791 // Z	ZNF479	NM_033273	2.22958e-05	1.54403	cEDS up vs Normal	1.34726	1.76953	49.1912	1.08762	0.24321
28477	8138392	NM_176813 // AGR3 // anterior gradient 3, protein disulphide isomerase family member //	AGR3	NM_176813	3.94938e-05	1.54191	cEDS up vs Normal	1.33411	1.78208	43.3472	1.08075	0.274257
15428	8009075	NM_025185 // TANC2 // tetratricopeptide repeat, ankyrin repeat and coiled-coil containi	TANC2	NM_025185	0.00386911	1.5419	cEDS up vs Normal	1.18695	2.00299	13.27	1.08071	0.895846
12218	7976621	NM_003384 // VRK1 // vaccinia related kinase 1 // 14q32 // 7443 /// XM_006720247 // VRK	VRK1	NM_003384	0.000596271	1.54178	cEDS up vs Normal	1.26172	1.884	22.5962	1.08034	0.525916
32142	8171896	NM_025159 // CXorf21 // chromosome X open reading frame 21 // Xp21.2 // 80231 /// ENST0	CXorf21	NM_025159	0.00019467	1.53868	cEDS up vs Normal	1.29376	1.82997	29.9278	1.07032	0.393398
12767	7981943	NR_001294 // SNORD64 // small nucleolar RNA, C/D box 64 // 15q12 // 347686 /// NR_02200	SNORD64	NR_001294	0.00699792	1.53635	cEDS up vs Normal	1.15438	2.0447	10.9324	1.06279	1.06937
8395	7939072	NM_001113528 // METTL15 // methyltransferase like 15 // 11p14.1 // 196074 /// NM_001297	METTL15	NM_001113528	0.00257472	1.53455	cEDS up vs Normal	1.2034	1.95681	15.0345	1.05699	0.773347
21335	8068478	NM_005441 // CHAF1B // chromatin assembly factor 1, subunit B (p60) // 21q22.13 // 8208	CHAF1B	NM_005441	0.000918808	1.53273	cEDS up vs Normal	1.24313	1.88979	20.1445	1.05115	0.573984
29058	8143663	NM_001203247 // EZH2 // enhancer of zeste 2 polycomb repressive complex 2 subunit // 7q	EZH2	NM_001203247	0.000594933	1.53263	cEDS up vs Normal	1.25777	1.86756	22.6095	1.05084	0.511257
28443	8138009	NM_001099697 // RSPH10B2 // radial spoke head 10 homolog B2 (Chlamydomonas) // 7p22.1 /	RSPH10B2	NM_001099697	3.27969e-06	1.53233	cEDS up vs Normal	1.3737	1.70928	73.8823	1.04987	0.156311
10384	7957688	NM_001306084 // CFAP54 // cilia and flagella associated 54 // 12q23.1 // 144535 /// XM_	CFAP54	NM_001306084	0.00028204	1.53164	cEDS up vs Normal	1.27998	1.83277	27.331	1.04764	0.421647
17562	8030944	NM_001099694 // ZNF578 // zinc finger protein 578 // 19q13.41 // 147660 /// XM_00525852	ZNF578	NM_001099694	0.00587509	1.53059	cEDS up vs Normal	1.16245	2.01533	11.5952	1.04429	0.990685
18680	8041781	NM_001430 // EPAS1 // endothelial PAS domain protein 1 // 2p21-p16 // 2034 /// XM_01153	EPAS1	NM_001430	0.000496892	1.52965	cEDS up vs Normal	1.26217	1.85381	23.69	1.04127	0.483493
11338	7968195	ENST00000362897 // RNU6-78P // RNA, U6 small nuclear 78, pseudogene // --- // 100873778	RNU6-78P	ENST00000362897	0.00112786	1.52955	cEDS up vs Normal	1.2345	1.89513	19.0486	1.04096	0.601123
9373	7948117	OTTHUMT00000391562 // OR5F2P // olfactory receptor, family 5, subfamily F, member 2 pse	OR5F2P	OTTHUMT00000391562	0.00172061	1.52857	cEDS up vs Normal	1.21807	1.91821	16.9179	1.03781	0.674782
14014	7994675	NM_181718 // ASPHD1 // aspartate beta-hydroxylase domain containing 1 // 16p11.2 // 253	ASPHD1	NM_181718	7.1742e-06	1.5284	cEDS up vs Normal	1.35846	1.7196	62.7487	1.03728	0.181837
31949	8170247	NR_037183 // SPANXA2-OT1 // SPANXA2 overlapping transcript 1 // Xq27.2 // 619455 /// EN	SPANXA2-OT1	NR_037183	0.00207693	1.52722	cEDS up vs Normal	1.20997	1.92764	16.0208	1.03349	0.709602
14030	7994889	NM_001256829 // TMEM265 // transmembrane protein 265 // 16p // 100862671 /// NM_006662	TMEM265	NM_001256829	3.08656e-05	1.52722	cEDS up vs Normal	1.33072	1.75274	45.7922	1.03351	0.248265
9788	7951789	NM_152315 // NXPE1 // neurexophilin and PC-esterase domain family, member 1 // 11q23.2	NXPE1	NM_152315	9.02525e-05	1.52656	cEDS up vs Normal	1.30688	1.78317	35.9078	1.0314	0.315958
17214	8027345	NM_020855 // ZNF492 // zinc finger protein 492 // 19p12 // 57615 /// ENST00000456783 //	ZNF492	NM_020855	0.00189469	1.52624	cEDS up vs Normal	1.21336	1.9198	16.4546	1.03038	0.688814
8987	7944722	NM_032873 // UBASH3B // ubiquitin associated and SH3 domain containing B // 11q24.1 //	UBASH3B	NM_032873	0.00161592	1.52602	cEDS up vs Normal	1.21959	1.90946	17.2241	1.02968	0.657594
15705	8012403	NM_001256834 // AURKB // aurora kinase B // 17p13.1 // 9212 /// NM_001284526 // AURKB /	AURKB	NM_001256834	0.00065336	1.52582	cEDS up vs Normal	1.25174	1.85992	22.0613	1.02904	0.513091
11164	7966172	NM_018711 // SVOP // SV2 related protein // 12q24.11 // 55530 /// ENST00000551211 // SV	SVOP	NM_018711	0.000151305	1.52535	cEDS up vs Normal	1.29359	1.79863	31.7964	1.02752	0.355473
19358	8048071	NR_002763 // CPS1-IT1 // CPS1 intronic transcript 1 // 2q34 // 29034 /// ENST0000062836	CPS1-IT1	NR_002763	7.03985e-05	1.52513	cEDS up vs Normal	1.31184	1.7731	38.0273	1.02684	0.297029
17625	8031499	NM_001144950 // SSC5D // scavenger receptor cysteine rich family, 5 domains // 19q13.42	SSC5D	NM_001144950	0.00367696	1.52463	cEDS up vs Normal	1.18406	1.96315	13.4834	1.02523	0.836401
4796	7902645	NM_001310156 // SPATA1 // spermatogenesis associated 1 // 1p22.3 // 100505741 /// XM_01	SPATA1	NM_001310156	0.000901733	1.52409	cEDS up vs Normal	1.2402	1.87297	20.2468	1.02352	0.556075
31352	8165217	NM_017617 // NOTCH1 // notch 1 // 9q34.3 // 4851 /// XM_011518717 // NOTCH1 // notch 1	NOTCH1	NM_017617	0.000351734	1.52395	cEDS up vs Normal	1.26995	1.82876	25.8661	1.02308	0.435083
23026	8085412	NM_001134382 // IQSEC1 // IQ motif and Sec7 domain 1 // 3p25.2 // 9922 /// NM_014869 //	IQSEC1	NM_001134382	0.000424564	1.52394	cEDS up vs Normal	1.26438	1.83677	24.6637	1.02302	0.456266
24605	8101118	NM_002416 // CXCL9 // chemokine (C-X-C motif) ligand 9 // 4q21 // 4283 /// ENST00000264	CXCL9	NM_002416	0.00125215	1.52331	cEDS up vs Normal	1.22819	1.88935	18.5056	1.02104	0.606919
17218	8027363	NM_001244038 // ZNF726 // zinc finger protein 726 // 19p12 // 730087 /// ENST0000032248	ZNF726	NM_001244038	0.00027403	1.52292	cEDS up vs Normal	1.27656	1.81682	27.5265	1.01979	0.407523
8464	7939839	NM_001098503 // PTPRJ // protein tyrosine phosphatase, receptor type, J // 11p11.2 // 5	PTPRJ	NM_001098503	0.00682862	1.52289	cEDS up vs Normal	1.15233	2.01261	11.0239	1.01969	1.01748
17583	8031037	NR_030214 // MIR517C // microRNA 517c // 19q13.42 // 574492 /// ENST00000385103 // MIR5	MIR517C	NR_030214	0.00111255	1.52273	cEDS up vs Normal	1.23225	1.88167	19.1204	1.01916	0.586326
12613	7980438	NM_004863 // SPTLC2 // serine palmitoyltransferase, long chain base subunit 2 // 14q24.	SPTLC2	NM_004863	0.000559654	1.52237	cEDS up vs Normal	1.25517	1.84644	22.9723	1.01803	0.487469
19986	8054702	NM_001304361 // CKAP2L // cytoskeleton associated protein 2-like // 2q13 // 150468 ///	CKAP2L	NM_001304361	0.00787592	1.52215	cEDS up vs Normal	1.14421	2.02493	10.4967	1.01733	1.06611
12248	7976836	NR_030175 // MIR495 // microRNA 495 // 14q32.31 // 574453 /// uc021scu.1 // MIR495 // m	MIR495	NR_030175	0.00129127	1.52194	cEDS up vs Normal	1.22652	1.88852	18.3478	1.01667	0.609521
10750	7961626	NM_021094 // SLCO1A2 // solute carrier organic anion transporter family, member 1A2 //	SLCO1A2	NM_021094	0.00116089	1.51957	cEDS up vs Normal	1.22946	1.87814	18.8977	1.00914	0.587403
13185	7985480	NR_003011 // SCARNA15 // small Cajal body-specific RNA 15 // 15q25.2 // 677778 /// ENST	SCARNA15	NR_003011	0.000568981	1.51927	cEDS up vs Normal	1.25327	1.84171	22.8738	1.00817	0.484827
7192	7926821	NM_001172303 // MASTL // microtubule associated serine/threonine kinase-like // 10p12.1	MASTL	NM_001172303	0.000379153	1.51849	cEDS up vs Normal	1.26519	1.8225	25.3815	1.00571	0.435859
24922	8104014	NM_001145411 // CCDC110 // coiled-coil domain containing 110 // 4q35.1 // 256309 /// NM	CCDC110	NM_001145411	0.00518675	1.51839	cEDS up vs Normal	1.16553	1.97806	12.0811	1.00538	0.915408
28222	8135990	NM_001127487 // FLNC // filamin C, gamma // 7q32-q35 // 2318 /// NM_001458 // FLNC // f	FLNC	NM_001127487	0.00941112	1.51791	cEDS up vs Normal	1.13291	2.03375	9.85858	1.00387	1.12009
12833	7982076	NR_003350 // SNORD115-35 // small nucleolar RNA, C/D box 115-35 // 15q11.2 // 100033809	SNORD115-35	NR_003350	5.39385e-08	1.51787	cEDS up vs Normal	1.41377	1.62965	167.112	1.00376	0.0660713
31055	8162006	NM_001135953 // GKAP1 // G kinase anchoring protein 1 // 9q21.32 // 80318 /// NM_025211	GKAP1	NM_001135953	0.00211762	1.51654	cEDS up vs Normal	1.20537	1.90803	15.9301	0.999522	0.690185
30105	8152764	NM_001282971 // MTSS1 // metastasis suppressor 1 // 8p22 // 9788 /// NM_001282974 // MT	MTSS1	NM_001282971	0.0100218	1.51627	cEDS up vs Normal	1.1288	2.03674	9.63846	0.998669	1.13974
24807	8103064	NM_001300761 // TTC29 // tetratricopeptide repeat domain 29 // 4q31.22 // 83894 /// NM_	TTC29	NM_001300761	0.000579822	1.51532	cEDS up vs Normal	1.25092	1.83559	22.7617	0.995654	0.481168
20947	8065013	NR_110635 // LINC00687 // long intergenic non-protein coding RNA 687 // 20p12.2 // 7284	LINC00687	NR_110635	4.80664e-05	1.51318	cEDS up vs Normal	1.31344	1.74329	41.4759	0.988904	0.262271
8586	7940561	NM_004111 // FEN1 // flap structure-specific endonuclease 1 // 11q12 // 2237 /// ENST00	FEN1	NM_004111	0.000639388	1.51264	cEDS up vs Normal	1.24667	1.83536	22.187	0.987207	0.489443
30679	8158446	NM_015354 // NUP188 // nucleoporin 188kDa // 9q34.11 // 23511 /// ENST00000372577 // NU	NUP188	NM_015354	9.43176e-05	1.51064	cEDS up vs Normal	1.29723	1.75915	35.5419	0.980891	0.30358
26776	8121727	NR_002730 // BRD7P3 // bromodomain containing 7 pseudogene 3 // 6q22.31 // 23629 /// uc	BRD7P3	NR_002730	3.26406e-05	1.50978	cEDS up vs Normal	1.31935	1.7277	45.2279	0.978199	0.23791
32566	8175587	NR_030236 // MIR509-1 // microRNA 509-1 // Xq27.3 // 574514 /// NR_030586 // MIR509-2 /	MIR509-1	NR_030236	0.000139292	1.50976	cEDS up vs Normal	1.28753	1.77033	32.4288	0.978123	0.331783
21437	8069582	NM_002772 // TMPRSS15 // transmembrane protease, serine 15 // 21q21.1 // 5651 /// XM_01	TMPRSS15	NM_002772	0.000573235	1.50928	cEDS up vs Normal	1.24859	1.8244	22.8295	0.97663	0.470572
13214	7985829	NM_001113378 // FANCI // Fanconi anemia complementation group I // 15q26.1 // 55215 ///	FANCI	NM_001113378	0.00410663	1.5091	cEDS up vs Normal	1.17413	1.93963	13.023	0.976056	0.824437
16080	8016139	NM_001264573 // KIF18B // kinesin family member 18B // 17q21.31 // 146909 /// NM_001265	KIF18B	NM_001264573	0.0011888	1.50829	cEDS up vs Normal	1.22411	1.85845	18.774	0.973514	0.570398
16964	8024843	NM_005483 // CHAF1A // chromatin assembly factor 1, subunit A (p150) // 19p13.3 // 1003	CHAF1A	NM_005483	3.42287e-05	1.50807	cEDS up vs Normal	1.3174	1.72633	44.7529	0.972816	0.239112
20063	8055275	XM_011512282 // LOC105373619 // collagen alpha-1(XI) chain-like // --- // 105373619	LOC105373619	XM_011512282	0.000307797	1.50766	cEDS up vs Normal	1.26595	1.79551	26.7442	0.971521	0.399591
10042	7954240	NM_033328 // CAPZA3 // capping protein (actin filament) muscle Z-line, alpha 3 // 12p12	CAPZA3	NM_033328	0.000119459	1.50712	cEDS up vs Normal	1.28983	1.76101	33.6288	0.969831	0.317233
12868	7982284	NR_027411 // GOLGA8CP // golgin A8 family, member C, pseudogene // 15q11.2 // 729786 //	GOLGA8CP	NR_027411	0.0047294	1.50646	cEDS up vs Normal	1.16666	1.94523	12.4485	0.967771	0.855161
28327	8136971	NM_001004135 // OR2A12 // olfactory receptor, family 2, subfamily A, member 12 // 7q35	OR2A12	NM_001004135	0.00021102	1.50639	cEDS up vs Normal	1.27539	1.77922	29.3478	0.96755	0.362652
11031	7964795	NM_018402 // IL26 // interleukin 26 // 12q15 // 55801 /// XM_011538568 // IL26 // inter	IL26	NM_018402	0.000249005	1.50593	cEDS up vs Normal	1.27083	1.78451	28.184	0.966097	0.377061
31691	8168146	NM_012310 // KIF4A // kinesin family member 4A // Xq13.1 // 24137 /// XM_011530893 // K	KIF4A	NM_012310	0.0047949	1.50585	cEDS up vs Normal	1.16582	1.94504	12.3934	0.965844	0.857255
21263	8067944	NR_029480 // MIRLET7C // microRNA let-7c // 21q21.1 // 406885 /// uc002yke.3 // MIRLET7	MIRLET7C	NR_029480	7.29846e-05	1.50488	cEDS up vs Normal	1.29982	1.74228	37.7135	0.962812	0.280826
10784	7962139	XM_011508343 // OVOS // ovostatin // 12p13 // 408186 /// XM_011508344 // OVOS // ovosta	OVOS	XM_011508343	0.00110464	1.5046	cEDS up vs Normal	1.22519	1.84773	19.158	0.961951	0.552327
12679	7981190	AL834311 // LOC100130815 // uncharacterized LOC100130815 // 14q32.2 // 100130815	LOC100130815	AL834311	0.000117267	1.50397	cEDS up vs Normal	1.28859	1.75535	33.7758	0.959973	0.312642
10221	7956005	NM_001258285 // OR2AP1 // olfactory receptor, family 2, subfamily AP, member 1 // 12q13	OR2AP1	NM_001258285	2.3814e-05	1.50383	cEDS up vs Normal	1.32187	1.71084	48.4863	0.95953	0.217687
29159	8144503	ENST00000310542 // FAM86B3P // family with sequence similarity 86, member A pseudogene	FAM86B3P	ENST00000310542	0.00193216	1.50356	cEDS up vs Normal	1.20432	1.87714	16.3615	0.958683	0.644533
25497	8109773	NM_001161661 // WWC1 // WW and C2 domain containing 1 // 5q34 // 23286 /// NM_001161662	WWC1	NM_001161661	0.000122346	1.50329	cEDS up vs Normal	1.28724	1.75561	33.44	0.95785	0.315082
9141	7946015	NM_001005329 // OR51A4 // olfactory receptor, family 51, subfamily A, member 4 // 11p15	OR51A4	NM_001005329	0.00061512	1.50273	cEDS up vs Normal	1.2435	1.81598	22.4132	0.956082	0.469229
24115	8096682	NM_001242729 // ARHGEF38 // Rho guanine nucleotide exchange factor 38 // 4q24 // 54848	ARHGEF38	NM_001242729	0.00183119	1.50258	cEDS up vs Normal	1.20603	1.87204	16.6175	0.955619	0.632573
26319	8117408	NM_021052 // HIST1H2AE // histone cluster 1, H2ae // 6p22.2 // 3012 /// ENST00000303910	HIST1H2AE	NM_021052	0.00194511	1.50088	cEDS up vs Normal	1.20309	1.87239	16.3298	0.950335	0.64016
4464	7899220	NM_006015 // ARID1A // AT rich interactive domain 1A (SWI-like) // 1p35.3 // 8289 /// N	ARID1A	NM_006015	1.59649e-05	1.50056	cEDS up vs Normal	1.32714	1.69664	52.898	0.949317	0.197408
18696	8041961	NM_001008708 // CHAC2 // ChaC, cation transport regulator homolog 2 (E. coli) // 2p16 /	CHAC2	NM_001008708	3.53868e-05	1.50003	cEDS up vs Normal	1.31204	1.71495	44.4227	0.947667	0.234662
11745	7972044	NM_001287392 // COMMD6 // COMM domain containing 6 // 13q22 // 170622 /// NM_001287393	COMMD6	NM_001287392	0.00379531	-1.50064	cEDS down vs Normal	-1.91628	-1.17514	13.3504	0.94956	0.782384
13046	7984152	NM_203373 // FBXL22 // F-box and leucine-rich repeat protein 22 // 15q22.31 // 283807 /	FBXL22	NM_203373	0.00116211	-1.50128	cEDS down vs Normal	-1.84425	-1.2221	18.8922	0.951584	0.55406
30946	8161249	NM_033412 // SLC25A51 // solute carrier family 25, member 51 // 9p13.3-p12 // 92014 ///	SLC25A51	NM_033412	0.000804847	-1.50144	cEDS down vs Normal	-1.82616	-1.23446	20.8747	0.952079	0.501702
12611	7980403	NM_001193314 // VIPAS39 // VPS33B interacting protein, apical-basolateral polarity regu	VIPAS39	NM_001193314	3.34937e-06	-1.50308	cEDS down vs Normal	-1.66878	-1.35383	73.562	0.957186	0.143132
11195	7966448	NM_001193453 // TMEM116 // transmembrane protein 116 // 12q24.13 // 89894 /// NM_001193	TMEM116	NM_001193453	0.00807555	-1.50515	cEDS down vs Normal	-1.98951	-1.13872	10.4057	0.963678	1.01872
21677	8071758	NM_005940 // MMP11 // matrix metallopeptidase 11 // 22q11.23 // 4320 /// NR_133013 // M	MMP11	NM_005940	0.00424854	-1.50747	cEDS down vs Normal	-1.93888	-1.17205	12.8834	0.970933	0.828998
18233	8037495	NM_145288 // ZNF296 // zinc finger protein 296 // 19q13.32 // 162979 /// ENST0000030380	ZNF296	NM_145288	0.000591502	-1.50792	cEDS down vs Normal	-1.82342	-1.24702	22.6436	0.972367	0.472364
22045	8075322	NM_001037666 // GATSL3 // GATS protein-like 3 // 22q12 // 652968 /// ENST00000404953 //	GATSL3	NM_001037666	8.26611e-08	-1.50891	cEDS down vs Normal	-1.62317	-1.4027	153.877	0.975476	0.0697326
10309	7956989	NM_001145337 // MDM2 // MDM2 proto-oncogene, E3 ubiquitin protein ligase // 12q14.3-q15	MDM2	NM_001145337	2.77206e-05	-1.50931	cEDS down vs Normal	-1.72282	-1.32226	46.893	0.976713	0.229114
16251	8017840	NM_014834 // LRRC37A // leucine rich repeat containing 37A // 17q21.31 // 9884 /// XM_0	LRRC37A	NM_014834	0.00317706	-1.50977	cEDS down vs Normal	-1.922	-1.18596	14.107	0.97817	0.762734
31858	8169459	NR_002993 // SNORA35 // small nucleolar RNA, H/ACA box 35 // Xq23 // 677816 /// ENST000	SNORA35	NR_002993	7.52153e-05	-1.51015	cEDS down vs Normal	-1.75147	-1.30208	37.4533	0.979351	0.287635
7563	7930627	NM_000684 // ADRB1 // adrenoceptor beta 1 // 10q25.3 // 153 /// ENST00000369295 // ADRB	ADRB1	NM_000684	0.000101716	-1.51219	cEDS down vs Normal	-1.76401	-1.29632	34.9215	0.985788	0.310516
16309	8018694	NM_002766 // PRPSAP1 // phosphoribosyl pyrophosphate synthetase-associated protein 1 //	PRPSAP1	NM_002766	2.55865e-06	-1.51239	cEDS down vs Normal	-1.67691	-1.36402	77.7582	0.986433	0.139545
31057	8162039	NM_032307 // C9orf64 // chromosome 9 open reading frame 64 // 9q21.32 // 84267 /// XM_0	C9orf64	NM_032307	0.00541696	-1.51255	cEDS down vs Normal	-1.96933	-1.16171	11.9105	0.986916	0.91147
18570	8040473	NM_004040 // RHOB // ras homolog family member B // 2p24 // 388 /// ENST00000272233 //	RHOB	NM_004040	0.00157397	-1.51444	cEDS down vs Normal	-1.88576	-1.21623	17.3535	0.992875	0.629361
19638	8051197	NM_001142683 // CCDC121 // coiled-coil domain containing 121 // 2p23.3 // 79635 /// NM_	CCDC121	NM_001142683	1.67777e-06	-1.51623	cEDS down vs Normal	-1.67487	-1.37262	84.762	0.998562	0.129589
32616	8176091	NR_103768 // CH17-340M24.3 // uncharacterized protein BC009467 // Xq28 // 158960 /// EN	CH17-340M24.3	NR_103768	8.08712e-06	-1.51868	cEDS down vs Normal	-1.70816	-1.35021	61.1807	1.0063	0.180928
4496	7899502	NR_004407 // RNU11 // RNA, U11 small nuclear // 1p35.3 // 26824 /// ENST00000387069 //	RNU11	NR_004407	0.00571709	-1.51902	cEDS down vs Normal	-1.98789	-1.16075	11.7006	1.0074	0.947083
16027	8015572	NM_001524 // HCRT // hypocretin (orexin) neuropeptide precursor // 17q21 // 3060 /// EN	HCRT	NM_001524	0.00152791	-1.52102	cEDS down vs Normal	-1.89654	-1.21986	17.5003	1.01375	0.6372
27505	8128977	NM_016262 // TUBE1 // tubulin, epsilon 1 // 6q21 // 51175 /// XM_011535874 // TUBE1 //	TUBE1	NM_016262	0.00243257	-1.52214	cEDS down vs Normal	-1.92819	-1.2016	15.2914	1.01731	0.731807
23442	8090133	NM_001308317 // CCDC14 // coiled-coil domain containing 14 // 3q21.1 // 64770 /// NM_02	CCDC14	NM_001308317	0.00490367	-1.52216	cEDS down vs Normal	-1.9813	-1.16942	12.3037	1.01737	0.909567
10118	7955063	NM_001143841 // TMEM106C // transmembrane protein 106C // 12q13.1 // 79022 /// NM_00114	TMEM106C	NM_001143841	0.000620128	-1.523	cEDS down vs Normal	-1.85238	-1.25219	22.3656	1.02005	0.501687
8770	7942594	NR_000025 // SNORD15B // small nucleolar RNA, C/D box 15B // 11q13.4 // 114599 /// ENST	SNORD15B	NR_000025	0.00219907	-1.52416	cEDS down vs Normal	-1.92541	-1.20653	15.7546	1.02374	0.714781
26746	8121502	NM_138408 // GTF3C6 // general transcription factor IIIC subunit 6 // 6q21 // 112495 //	GTF3C6	NM_138408	0.000710373	-1.52423	cEDS down vs Normal	-1.86114	-1.24831	21.5798	1.02396	0.521951
24076	8096301	NM_000582 // SPP1 // secreted phosphoprotein 1 // 4q22.1 // 6696 /// NM_001040058 // SP	SPP1	NM_000582	0.00834065	-1.52574	cEDS down vs Normal	-2.03882	-1.14178	10.2889	1.02877	1.09988
25168	8106494	NM_001178005 // BHMT2 // betaine--homocysteine S-methyltransferase 2 // 5q13 // 23743 /	BHMT2	NM_001178005	0.0059153	-1.52763	cEDS down vs Normal	-2.00954	-1.16129	11.569	1.03482	0.983929
11101	7965510	NM_001301036 // TMCC3 // transmembrane and coiled-coil domain family 3 // 12q22 // 5745	TMCC3	NM_001301036	1.47448e-05	-1.5286	cEDS down vs Normal	-1.73616	-1.34586	53.814	1.03793	0.212161
28144	8135211	NM_001145268 // FAM185A // family with sequence similarity 185, member A // 7q22.1 // 2	FAM185A	NM_001145268	0.00555084	-1.52941	cEDS down vs Normal	-2.0076	-1.16512	11.8152	1.04051	0.968717
32190	8172379	NM_001037735 // ZNF630 // zinc finger protein 630 // Xp11.3-p11.1 // 57232 /// NM_00119	ZNF630	NM_001037735	0.00301182	-1.53139	cEDS down vs Normal	-1.96184	-1.19538	14.3392	1.04684	0.803063
26386	8117746	NR_003049 // SNORD32B // small nucleolar RNA, C/D box 32B // 6p22.1 // 692092 /// ENST0	SNORD32B	NR_003049	0.00186022	-1.53386	cEDS down vs Normal	-1.93341	-1.21688	16.5422	1.05479	0.701395
15019	8005233	OTTHUMT00000131100 // COTL1P1 // coactosin-like F-actin binding protein 1 pseudogene 1	COTL1P1	OTTHUMT00000131100	0.00748042	-1.53513	cEDS down vs Normal	-2.04872	-1.1503	10.6854	1.05888	1.09006
28256	8136341	NM_001293085 // BPGM // 2,3-bisphosphoglycerate mutase // 7q33 // 669 /// NM_001724 //	BPGM	NM_001293085	0.00676317	-1.53586	cEDS down vs Normal	-2.04025	-1.15617	11.06	1.06123	1.05547
27166	8125321	NM_030651 // PRRT1 // proline-rich transmembrane protein 1 // 6p21.32 // 80863 /// XM_0	PRRT1	NM_030651	0.00026318	-1.53953	cEDS down vs Normal	-1.84336	-1.28579	27.8025	1.07307	0.424558
24393	8099193	XM_011513603 // C4orf50 // chromosome 4 open reading frame 50 // 4p16.2 // 389197 /// X	C4orf50	XM_011513603	0.00180825	-1.54129	cEDS down vs Normal	-1.94601	-1.22075	16.678	1.07877	0.7115
12773	7981955	NR_003319 // SNORD116-4 // small nucleolar RNA, C/D box 116-4 // 15q11.2 // 100033416 /	SNORD116-4	NR_003319	0.00502302	-1.54219	cEDS down vs Normal	-2.02606	-1.17388	12.2081	1.08167	0.97463
17224	8027390	NM_006627 // POP4 // POP4 homolog, ribonuclease P/MRP subunit // 19q12 // 10775 /// NR_	POP4	NM_006627	0.000433589	-1.5427	cEDS down vs Normal	-1.87046	-1.27237	24.5319	1.0833	0.485748
31267	8164215	NR_002449 // SNORA65 // small nucleolar RNA, H/ACA box 65 // 9q34 // 26783 /// ENST0000	SNORA65	NR_002449	1.76479e-05	-1.54303	cEDS down vs Normal	-1.76199	-1.35128	51.7619	1.08439	0.230445
4752	7902227	NM_001199741 // GADD45A // growth arrest and DNA-damage-inducible, alpha // 1p31.2 // 1	GADD45A	NM_001199741	0.00518294	-1.54368	cEDS down vs Normal	-2.03208	-1.17266	12.084	1.08648	0.98901
22030	8075182	NM_001079539 // XBP1 // X-box binding protein 1 // 22q12.1|22q12 // 7494 /// NM_005080	XBP1	NM_001079539	0.000200974	-1.54384	cEDS down vs Normal	-1.83982	-1.29548	29.6976	1.08701	0.40263
14411	7998898	NM_021195 // CLDN6 // claudin 6 // 16p13.3 // 9074 /// ENST00000328796 // CLDN6 // clau	CLDN6	NM_021195	0.00481473	-1.5446	cEDS down vs Normal	-2.02743	-1.17676	12.3769	1.08949	0.968287
11185	7966343	ENST00000551655 // VPS29 // VPS29 retromer complex component // 12q24 // 51699 /// OTTH	VPS29	ENST00000551655	0.00043148	-1.54538	cEDS down vs Normal	-1.87493	-1.27375	24.5624	1.092	0.489042
8669	7941457	NM_006848 // CCDC85B // coiled-coil domain containing 85B // 11q12.1 // 11007 /// ENST0	CCDC85B	NM_006848	4.83099e-05	-1.54625	cEDS down vs Normal	-1.79475	-1.33215	41.4287	1.09483	0.290695
4743	7902104	NM_001037339 // PDE4B // phosphodiesterase 4B, cAMP-specific // 1p31 // 5142 /// NM_001	PDE4B	NM_001037339	0.00413896	-1.54719	cEDS down vs Normal	-2.01971	-1.18521	12.9907	1.09788	0.929643
16794	8023184	NM_001037802 // SKOR2 // SKI family transcriptional corepressor 2 // 18q21.1 // 652991	SKOR2	NM_001037802	1.16972e-05	-1.54874	cEDS down vs Normal	-1.76027	-1.36264	56.5589	1.10295	0.214509
22932	8084694	NM_001967 // EIF4A2 // eukaryotic translation initiation factor 4A2 // 3q28 // 1974 ///	EIF4A2	NM_001967	1.10269e-05	-1.54967	cEDS down vs Normal	-1.76022	-1.36431	57.2771	1.10597	0.212401
6012	7915078	NM_001099439 // EPHA10 // EPH receptor A10 // 1p34.3 // 284656 /// NM_173641 // EPHA10	EPHA10	NM_001099439	0.000573502	-1.55227	cEDS down vs Normal	-1.90083	-1.26763	22.8267	1.11445	0.537043
24692	8102006	NM_005908 // MANBA // mannosidase, beta A, lysosomal // 4q24 // 4126 /// XM_011531965 /	MANBA	NM_005908	0.00474319	-1.55348	cEDS down vs Normal	-2.04503	-1.18007	12.4368	1.11838	0.989173
26659	8120833	NM_031469 // SH3BGRL2 // SH3 domain binding glutamate-rich protein like 2 // 6q14.1 //	SH3BGRL2	NM_031469	0.00288914	-1.55429	cEDS down vs Normal	-2.0052	-1.20478	14.5216	1.12105	0.849184
14958	8004506	NR_002918 // SNORA48 // small nucleolar RNA, H/ACA box 48 // 17p13.1 // 652965 /// ENST	SNORA48	NR_002918	0.000467174	-1.55468	cEDS down vs Normal	-1.89503	-1.27545	24.0684	1.12231	0.512928
6156	7916570	NM_145243 // OMA1 // OMA1 zinc metallopeptidase // 1p32.2-p32.1 // 115209 /// ENST00000	OMA1	NM_145243	0.000326145	-1.55625	cEDS down vs Normal	-1.88114	-1.28747	26.3605	1.12745	0.470476
17547	8030842	NR_029843 // MIR99B // microRNA 99b // 19q13.41 // 407056 /// ENST00000384819 // MIR99B	MIR99B	NR_029843	2.99174e-05	-1.557	cEDS down vs Normal	-1.79728	-1.34884	46.1096	1.12992	0.269556
31904	8169898	NM_004794 // RAB33A // RAB33A, member RAS oncogene family // Xq26.1 // 9363 /// ENST000	RAB33A	NM_004794	0.0013849	-1.5586	cEDS down vs Normal	-1.96219	-1.23802	17.9921	1.13516	0.694013
20518	8060604	NM_000915 // OXT // oxytocin/neurophysin I prepropeptide // 20p13 // 5020 /// XM_011529	OXT	NM_000915	7.61215e-07	-1.55904	cEDS down vs Normal	-1.71961	-1.41347	99.4169	1.13662	0.125762
15720	8012581	NM_004853 // STX8 // syntaxin 8 // 17p12 // 9482 /// NR_033656 // STX8 // syntaxin 8 //	STX8	NM_004853	0.000613775	-1.55985	cEDS down vs Normal	-1.91789	-1.26865	22.426	1.13928	0.558818
31518	8166630	OTTHUMT00000056165 // CKS1BP6 // CDC28 protein kinase regulatory subunit 1B pseudogene	CKS1BP6	OTTHUMT00000056165	1.97068e-05	-1.56246	cEDS down vs Normal	-1.79396	-1.36082	50.5348	1.14784	0.249853
13529	7989611	NM_001014812 // FAM96A // family with sequence similarity 96, member A // 15q22.31 // 8	FAM96A	NM_001014812	0.000200408	-1.56577	cEDS down vs Normal	-1.87649	-1.30649	29.7179	1.15875	0.428908
9684	7950933	NM_001143836 // NOX4 // NADPH oxidase 4 // 11q14.2-q21 // 50507 /// NM_001143837 // NOX	NOX4	NM_001143836	0.00598362	-1.56991	cEDS down vs Normal	-2.10313	-1.17188	11.5248	1.17245	1.11906
6338	7918467	NM_001006945 // LRIF1 // ligand dependent nuclear receptor interacting factor 1 // 1p13	LRIF1	NM_001006945	7.53751e-05	-1.57027	cEDS down vs Normal	-1.84703	-1.33499	37.435	1.17366	0.344873
8865	7943376	NM_020802 // CEP126 // centrosomal protein 126kDa // 11q22.1 // 57562 /// XM_005271627	CEP126	NM_020802	0.000179387	-1.57324	cEDS down vs Normal	-1.88448	-1.3134	30.5246	1.18349	0.426487
26507	8119088	NM_000389 // CDKN1A // cyclin-dependent kinase inhibitor 1A (p21, Cip1) // 6p21.2 // 10	CDKN1A	NM_000389	4.69111e-05	-1.57509	cEDS down vs Normal	-1.83887	-1.34915	41.7041	1.18964	0.313783
6752	7922414	NR_003942 // SNORD76 // small nucleolar RNA, C/D box 76 // 1q25.1 // 692196 /// ENST000	SNORD76	NR_003942	0.00670351	-1.57603	cEDS down vs Normal	-2.12874	-1.16683	11.0932	1.19278	1.18276
32133	8171867	NM_139058 // ARX // aristaless related homeobox // Xp21.3 // 170302 /// ENST00000379044	ARX	NM_139058	2.05552e-05	-1.57605	cEDS down vs Normal	-1.81561	-1.3681	50.0726	1.19284	0.262044
18398	8039044	NM_001136038 // ZNF415 // zinc finger protein 415 // 19q13.42 // 55786 /// NM_001164309	ZNF415	NM_001136038	0.00385078	-1.57639	cEDS down vs Normal	-2.07494	-1.19763	13.2898	1.19398	0.988261
9269	7947147	NM_148893 // SVIP // small VCP/p97-interacting protein // 11p14.2 // 258010 /// ENST000	SVIP	NM_148893	9.50586e-05	-1.57643	cEDS down vs Normal	-1.86518	-1.33238	35.4772	1.1941	0.370241
27707	8131087	NM_001080461 // UNCX // UNC homeobox // 7p22.3 // 340260 /// ENST00000316333 // UNCX //	UNCX	NM_001080461	0.000169263	-1.5801	cEDS down vs Normal	-1.89358	-1.31851	30.9541	1.20633	0.428688
32525	8175319	NM_001185063 // ZNF75D // zinc finger protein 75D // Xq26.3 // 7626 /// NM_007131 // ZN	ZNF75D	NM_001185063	0.000431546	-1.5815	cEDS down vs Normal	-1.93855	-1.29021	24.5614	1.211	0.542355
6602	7920875	NR_003005 // SCARNA4 // small Cajal body-specific RNA 4 // 1q22 // 677771 /// ENST00000	SCARNA4	NR_003005	0.000928342	-1.58504	cEDS down vs Normal	-1.98735	-1.26417	20.0883	1.22286	0.669615
13126	7985001	NM_001256552 // NEIL1 // nei-like DNA glycosylase 1 // 15q24.2 // 79661 /// NM_024608 /	NEIL1	NM_001256552	0.000404548	-1.58979	cEDS down vs Normal	-1.94995	-1.29615	24.9683	1.23878	0.545754
29717	8149399	NM_152271 // LONRF1 // LON peptidase N-terminal domain and ring finger 1 // 8p23.1 // 9	LONRF1	NM_152271	1.00452e-06	-1.59282	cEDS down vs Normal	-1.77032	-1.43311	94.0322	1.24898	0.146107
5685	7911376	NM_001142467 // HES4 // hes family bHLH transcription factor 4 // 1p36.33 // 57801 ///	HES4	NM_001142467	4.91509e-05	-1.59568	cEDS down vs Normal	-1.87274	-1.3596	41.2676	1.25863	0.33549
8889	7943690	NM_004398 // DDX10 // DEAD (Asp-Glu-Ala-Asp) box polypeptide 10 // 11q22-q23 // 1662 //	DDX10	NM_004398	0.00104403	-1.59665	cEDS down vs Normal	-2.01654	-1.26419	19.4566	1.2619	0.713429
11071	7965200	NM_014167 // CCDC59 // coiled-coil domain containing 59 // 12q21.31 // 29080 /// NR_033	CCDC59	NM_014167	7.40632e-05	-1.59675	cEDS down vs Normal	-1.88887	-1.34981	37.5865	1.26226	0.36941
6797	7922846	NM_052966 // FAM129A // family with sequence similarity 129, member A // 1q25 // 116496	FAM129A	NM_052966	0.00265639	-1.60141	cEDS down vs Normal	-2.09474	-1.22426	14.8944	1.27801	0.943851
11630	7971077	NM_001135934 // POSTN // periostin, osteoblast specific factor // 13q13.3 // 10631 ///	POSTN	NM_001135934	0.00295211	-1.60557	cEDS down vs Normal	-2.11244	-1.22032	14.4269	1.29212	0.985202
15113	8005955	NR_000014 // SNORD42A // small nucleolar RNA, C/D box 42A // 17q11 // 26809 /// ENST000	SNORD42A	NR_000014	0.000222063	-1.60626	cEDS down vs Normal	-1.94966	-1.32335	28.9854	1.2945	0.491264
18379	8038925	NM_001199324 // ZNF615 // zinc finger protein 615 // 19q13.41 // 284370 /// NM_198480 /	ZNF615	NM_001199324	0.00463977	-1.60686	cEDS down vs Normal	-2.15812	-1.19641	12.5255	1.29653	1.13863
12035	7974587	NM_018477 // ACTR10 // actin-related protein 10 homolog (S. cerevisiae) // 14q23.1 // 5	ACTR10	NM_018477	2.00714e-06	-1.61104	cEDS down vs Normal	-1.80939	-1.43444	81.7214	1.31078	0.176435
11757	7972217	NM_005842 // SPRY2 // sprouty RTK signaling antagonist 2 // 13q31.1 // 10253 /// XM_005	SPRY2	NM_005842	0.000832113	-1.61211	cEDS down vs Normal	-2.0312	-1.2795	20.6893	1.31443	0.698853
32512	8175256	NR_024607 // MIR503HG // MIR503 host gene // Xq26.3 // 84848 /// ENST00000414769 // MIR	MIR503HG	NR_024607	0.00319862	-1.61263	cEDS down vs Normal	-2.13441	-1.21841	14.0777	1.31621	1.02846
21107	8066402	NM_016470 // OSER1 // oxidative stress responsive serine-rich 1 // 20q13.11 // 51526 //	OSER1	NM_016470	3.93152e-06	-1.61353	cEDS down vs Normal	-1.82805	-1.42418	71.1609	1.31926	0.203931
8916	7943919	NM_017868 // TTC12 // tetratricopeptide repeat domain 12 // 11q23.2 // 54970 /// XM_005	TTC12	NM_017868	0.00954872	-1.61563	cEDS down vs Normal	-2.26342	-1.15323	9.80752	1.32645	1.48773
32269	8173201	NM_007156 // ZXDA // zinc finger, X-linked, duplicated A // Xp11.1 // 7789 /// ENST0000	ZXDA	NM_007156	8.89759e-05	-1.61804	cEDS down vs Normal	-1.93029	-1.35629	36.0268	1.3347	0.407522
28911	8142324	NM_001130475 // THAP5 // THAP domain containing 5 // 7q31.1 // 168451 /// NM_001287598	THAP5	NM_001130475	0.000655006	-1.62062	cEDS down vs Normal	-2.03221	-1.29239	22.0468	1.34356	0.670355
8042	7935572	NM_032709 // PYROXD2 // pyridine nucleotide-disulphide oxidoreductase domain 2 // 10q24	PYROXD2	NM_032709	0.00445507	-1.62397	cEDS down vs Normal	-2.19122	-1.20357	12.6898	1.35509	1.17464
20430	8059712	ENST00000365530 // SNORD82 // small nucleolar RNA, C/D box 82 // 2q37.1 // 25826 /// uc	SNORD82	ENST00000365530	0.00210251	-1.62538	cEDS down vs Normal	-2.12404	-1.24378	15.9636	1.35993	0.937082
10814	7962367	NM_033114 // ZCRB1 // zinc finger CCHC-type and RNA binding motif 1 // 12q12 // 85437 /	ZCRB1	NM_033114	0.000411231	-1.63369	cEDS down vs Normal	-2.02891	-1.31546	24.8646	1.38866	0.614336
29853	8150714	NM_001286782 // PCMTD1 // protein-L-isoaspartate (D-aspartate) O-methyltransferase doma	PCMTD1	NM_001286782	4.15845e-05	-1.63677	cEDS down vs Normal	-1.93169	-1.38687	42.8493	1.39931	0.359222
27801	8132031	NM_175887 // PRR15 // proline rich 15 // 7p14.3 // 222171 /// XM_005249653 // PRR15 //	PRR15	NM_175887	0.00384753	-1.63717	cEDS down vs Normal	-2.20463	-1.21577	13.2933	1.4007	1.15906
19483	8049471	NM_020311 // ACKR3 // atypical chemokine receptor 3 // 2q37.3 // 57007 /// XM_005246097	ACKR3	NM_020311	0.00434105	-1.64021	cEDS down vs Normal	-2.22396	-1.20968	12.7953	1.41126	1.21325
15278	8007548	NR_026770 // FAM215A // family with sequence similarity 215, member A (non-protein codi	FAM215A	NR_026770	2.85317e-05	-1.64697	cEDS down vs Normal	-1.93443	-1.40223	46.5955	1.43482	0.338725
25186	8106709	NM_001131028 // ATG10 // autophagy related 10 // 5q14.1 // 83734 /// NM_031482 // ATG10	ATG10	NM_001131028	4.42038e-07	-1.64713	cEDS down vs Normal	-1.82829	-1.48391	110.791	1.43537	0.142513
7416	7928959	NM_000314 // PTEN // phosphatase and tensin homolog // 10q23.3 // 5728 /// NM_001304717	PTEN	NM_000314	3.37724e-06	-1.65387	cEDS down vs Normal	-1.88201	-1.45339	73.4361	1.45899	0.218542
15610	8011220	NR_029625 // MIR212 // microRNA 212 // 17p13.3 // 406994 /// ENST00000586026 // MIR212	MIR212	NR_029625	3.50086e-06	-1.65512	cEDS down vs Normal	-1.88471	-1.45351	72.8922	1.46338	0.220835
17034	8025584	NR_004381 // SNORD105 // small nucleolar RNA, C/D box 105 // 19p13.2 // 692229 /// ENST	SNORD105	NR_004381	0.00055497	-1.65768	cEDS down vs Normal	-2.0902	-1.31466	23.0225	1.47234	0.703474
30067	8152355	NM_001099743 // SYBU // syntabulin (syntaxin-interacting) // 8q23.2 // 55638 /// NM_001	SYBU	NM_001099743	0.00415481	-1.66136	cEDS down vs Normal	-2.26556	-1.2183	12.9749	1.48532	1.25923
32906	8178435	NM_003897 // IER3 // immediate early response 3 // 6p21.3 // 8870 /// ENST00000259874 /	IER3	NM_003897	0.00506322	-1.66159	cEDS down vs Normal	-2.28886	-1.20623	12.1765	1.4861	1.34252
18361	8038782	NM_145232 // CTU1 // cytosolic thiouridylase subunit 1 // 19q13.41 // 90353 /// ENST000	CTU1	NM_145232	0.00120058	-1.66167	cEDS down vs Normal	-2.15143	-1.2834	18.7228	1.48639	0.87328
25377	8108627	NR_026703 // VTRNA1-1 // vault RNA 1-1 // 5q31.3 // 56664 /// uc011czv.1 // VTRNA1-1 //	VTRNA1-1	NR_026703	0.000228263	-1.67257	cEDS down vs Normal	-2.06546	-1.35442	28.7911	1.52492	0.582614
30046	8152215	NM_001032282 // KLF10 // Kruppel-like factor 10 // 8q22.2 // 7071 /// NM_005655 // KLF1	KLF10	NM_001032282	0.00462282	-1.67388	cEDS down vs Normal	-2.30556	-1.21527	12.5402	1.52955	1.34169
24798	8102988	NM_002102 // GYPE // glycophorin E (MNS blood group) // 4q31.1 // 2996 /// NM_198682 //	GYPE	NM_002102	0.000157071	-1.68177	cEDS down vs Normal	-2.06198	-1.37167	31.5136	1.55761	0.543693
8426	7939411	NM_001276722 // C11orf74 // chromosome 11 open reading frame 74 // 11p12 // 119710 ///	C11orf74	NM_001276722	0.000366352	-1.68265	cEDS down vs Normal	-2.11008	-1.34181	25.6024	1.56076	0.670575
5551	7910381	AK055963 // DUSP5P1 // dual specificity phosphatase 5 pseudogene 1 // 1q42.13 // 574029	DUSP5P1	AK055963	0.00715386	-1.68419	cEDS down vs Normal	-2.38595	-1.18883	10.8504	1.56624	1.58784
9305	7947512	NM_001001991 // PAMR1 // peptidase domain containing associated with muscle regeneratio	PAMR1	NM_001001991	0.00881116	-1.6849	cEDS down vs Normal	-2.41852	-1.17381	10.0921	1.56876	1.70989
18225	8037430	NM_001033719 // ZNF404 // zinc finger protein 404 // 19q13.31 // 342908 /// ENST0000032	ZNF404	NM_001033719	4.655e-05	-1.68538	cEDS down vs Normal	-2.01323	-1.41091	41.7767	1.57047	0.413512
32406	8174361	NM_001015881 // TSC22D3 // TSC22 domain family, member 3 // Xq22.3 // 1831 /// NM_00408	TSC22D3	NM_001015881	0.0083128	-1.68606	cEDS down vs Normal	-2.41244	-1.17839	10.3009	1.57292	1.67967
6785	7922717	NM_002928 // RGS16 // regulator of G-protein signaling 16 // 1q25-q31 // 6004 /// ENST0	RGS16	NM_002928	0.00421628	-1.68668	cEDS down vs Normal	-2.32317	-1.22457	12.9146	1.57513	1.34161
26875	8122724	NM_025218 // ULBP1 // UL16 binding protein 1 // 6q25 // 80329 /// ENST00000229708 // UL	ULBP1	NM_025218	0.00433072	-1.68699	cEDS down vs Normal	-2.32703	-1.22299	12.805	1.57622	1.35404
16479	8020179	NM_020412 // CHMP1B // charged multivesicular body protein 1B // 18p11.21 // 57132 ///	CHMP1B	NM_020412	0.00424155	-1.69088	cEDS down vs Normal	-2.33321	-1.22538	12.8901	1.59014	1.35698
26018	8114625	NM_194249 // DND1 // DND microRNA-mediated repression inhibitor 1 // 5q31.3 // 373863 /	DND1	NM_194249	0.00485912	-1.69808	cEDS down vs Normal	-2.36614	-1.21865	12.3402	1.616	1.4405
9697	7951036	NR_003033 // SNORD5 // small nucleolar RNA, C/D box 5 // 11q21 // 692072 /// ENST000004	SNORD5	NR_003033	0.00537263	-1.69923	cEDS down vs Normal	-2.38175	-1.21229	11.9427	1.6201	1.49222
8839	7943160	NR_002569 // SCARNA9 // small Cajal body-specific RNA 9 // 11q21 // 619383 /// uc001pdv	SCARNA9	NR_002569	0.000836684	-1.70255	cEDS down vs Normal	-2.20297	-1.3158	20.6589	1.63207	0.86901
17078	8026047	NM_002229 // JUNB // jun B proto-oncogene // 19p13.2 // 3726 /// ENST00000302754 // JUN	JUNB	NM_002229	0.009603	-1.70778	cEDS down vs Normal	-2.48859	-1.17195	9.78762	1.65094	1.85544
28473	8138361	AY927233 // RPL36A // ribosomal protein L36a // Xq22.1 // 6173 /// BC001781 // RPL36A /	RPL36A	AY927233	0.00157839	-1.71893	cEDS down vs Normal	-2.28879	-1.29095	17.3397	1.69133	1.07295
27944	8133106	NR_002961 // SNORA22 // small nucleolar RNA, H/ACA box 22 // 7q11.21 // 677807 /// ENST	SNORA22	NR_002961	0.000530444	-1.72241	cEDS down vs Normal	-2.20711	-1.34416	23.2938	1.704	0.804676
24872	8103563	NM_017631 // DDX60 // DEAD (Asp-Glu-Ala-Asp) box polypeptide 60 // 4q32.3 // 55601 ///	DDX60	NM_017631	0.00253638	-1.72699	cEDS down vs Normal	-2.35332	-1.26735	15.1021	1.72066	1.25328
31495	8166469	NM_002970 // SAT1 // spermidine/spermine N1-acetyltransferase 1 // Xp22.1 // 6303 /// N	SAT1	NM_002970	0.000539689	-1.72808	cEDS down vs Normal	-2.21893	-1.34581	23.1898	1.72466	0.818084
23448	8090214	NM_001195483 // SLC12A8 // solute carrier family 12, member 8 // 3q21.2 // 84561 /// NM	SLC12A8	NM_001195483	0.00527488	-1.73709	cEDS down vs Normal	-2.46664	-1.22332	12.0148	1.75761	1.60916
11991	7974214	NM_172193 // KLHDC1 // kelch domain containing 1 // 14q21.3 // 122773 /// XM_011536422	KLHDC1	NM_172193	1.3667e-05	-1.74274	cEDS down vs Normal	-2.05598	-1.47721	54.7011	1.77831	0.357605
30162	8153426	NM_001100878 // MROH6 // maestro heat-like repeat family member 6 // 8q24.3 // 642475 /	MROH6	NM_001100878	1.32053e-05	-1.74452	cEDS down vs Normal	-2.05746	-1.47918	55.1068	1.78487	0.356282
26658	8120826	NM_001010844 // IRAK1BP1 // interleukin 1 receptor associated kinase 1 binding protein	IRAK1BP1	NM_001010844	0.00110676	-1.74656	cEDS down vs Normal	-2.31206	-1.31937	19.1479	1.79237	1.02967
30593	8157487	NM_002581 // PAPPA // pregnancy-associated plasma protein A, pappalysin 1 // 9q33.2 //	PAPPA	NM_002581	0.00154421	-1.74992	cEDS down vs Normal	-2.35001	-1.30307	17.4478	1.80474	1.1378
25252	8107321	NR_015370 // EPB41L4A-AS1 // EPB41L4A antisense RNA 1 // 5q22.2 // 114915 /// AB048207	EPB41L4A-AS1	NR_015370	4.83671e-06	-1.75148	cEDS down vs Normal	-2.03375	-1.50839	68.1582	1.81051	0.292197
7218	7927062	NM_001278170 // ZNF33A // zinc finger protein 33A // 10p11.2 // 7581 /// NM_001278171 /	ZNF33A	NM_001278170	2.49507e-07	-1.75434	cEDS down vs Normal	-1.96046	-1.5699	124.037	1.82106	0.161497
12770	7981949	NR_003316 // SNORD116-1 // small nucleolar RNA, C/D box 116-1 // 15q11.2 // 100033413 /	SNORD116-1	NR_003316	0.00222887	-1.75837	cEDS down vs Normal	-2.40601	-1.28506	15.6923	1.83596	1.28697
11655	7971296	NM_001002264 // EPSTI1 // epithelial stromal interaction 1 (breast) // 13q13.3 // 94240	EPSTI1	NM_001002264	0.000727877	-1.76237	cEDS down vs Normal	-2.30714	-1.34623	21.441	1.85077	0.949508
23102	8086330	NM_033027 // CSRNP1 // cysteine-serine-rich nuclear protein 1 // 3p22 // 64651 /// XM_0	CSRNP1	NM_033027	0.00348539	-1.76691	cEDS down vs Normal	-2.47837	-1.25968	13.7097	1.86761	1.49847
15261	8007427	ENST00000566825 // AOC4P // amine oxidase, copper containing 4, pseudogene // 17q21.31	AOC4P	ENST00000566825	0.0030055	-1.7707	cEDS down vs Normal	-2.46791	-1.27046	14.3484	1.88169	1.44258
17504	8030364	NR_000019 // SNORD34 // small nucleolar RNA, C/D box 34 // 19q13.3 // 26817 /// ENST000	SNORD34	NR_000019	0.00298644	-1.78088	cEDS down vs Normal	-2.48958	-1.27392	14.3762	1.91965	1.46883
17768	8032749	NR_002602 // SNORD37 // small nucleolar RNA, C/D box 37 // 19p13.3 // 26812 /// ENST000	SNORD37	NR_002602	0.00261114	-1.78888	cEDS down vs Normal	-2.49034	-1.285	14.9714	1.9496	1.43244
21529	8070489	NM_020639 // RIPK4 // receptor-interacting serine-threonine kinase 4 // 21q22.3 // 5410	RIPK4	NM_020639	0.000493722	-1.79147	cEDS down vs Normal	-2.33141	-1.37658	23.7291	1.9593	0.908267
25778	8112596	NM_023039 // ANKRA2 // ankyrin repeat, family A (RFXANK-like), 2 // 5q12-q13 // 57763 /	ANKRA2	NM_023039	4.65821e-05	-1.79639	cEDS down vs Normal	-2.193	-1.47151	41.7702	1.97778	0.520838
4310	7897801	ENST00000362477 // RNU5E-1 // RNA, U5E small nuclear 1 // 1p36.22 // 26829 /// NR_00275	RNU5E-1	ENST00000362477	0.00628692	-1.80376	cEDS down vs Normal	-2.65245	-1.22662	11.3358	2.00551	1.9461
8475	7939897	AB231735 // LOC101060256 // tripartite motif-containing protein 51-like // --- // 10106	LOC101060256	AB231735	0.00424192	-1.81598	cEDS down vs Normal	-2.61794	-1.25969	12.8897	2.05169	1.7509
15768	8013112	NM_001199989 // RASD1 // RAS, dexamethasone-induced 1 // 17p11.2 // 51655 /// NM_016084	RASD1	NM_001199989	0.000286673	-1.82897	cEDS down vs Normal	-2.3595	-1.41773	27.2209	2.10099	0.849014
18580	8040522	NM_001080473 // MFSD2B // major facilitator superfamily domain containing 2B // 2p23.3	MFSD2B	NM_001080473	8.44509e-05	-1.83647	cEDS down vs Normal	-2.29193	-1.47152	36.4652	2.12957	0.6424
16240	8017704	NR_026903 // AMZ2P1 // archaelysin family metallopeptidase 2 pseudogene 1 // 17q24.1 //	AMZ2P1	NR_026903	0.0073792	-1.87056	cEDS down vs Normal	-2.84884	-1.22822	10.7356	2.26041	2.31608
21544	8070665	NM_173354 // SIK1 // salt-inducible kinase 1 // 21q22.3 // 150094 /// XM_011529474 // S	SIK1	NM_173354	0.000123059	-1.88188	cEDS down vs Normal	-2.39429	-1.47913	33.3942	2.30418	0.758993
12798	7982006	NR_003360 // SNORD116-29 // small nucleolar RNA, C/D box 116-29 // 15q11.2 // 100033821	SNORD116-29	NR_003360	0.000479044	-1.88371	cEDS down vs Normal	-2.50491	-1.41656	23.9139	2.31125	1.06313
17503	8030362	NR_000020 // SNORD33 // small nucleolar RNA, C/D box 33 // 19q13.3 // 26818 /// ENST000	SNORD33	NR_000020	0.00582054	-1.8864	cEDS down vs Normal	-2.84131	-1.25242	11.6312	2.32169	2.1957
28651	8139796	XR_927305 // LOC105375299 // uncharacterized LOC105375299 // --- // 105375299 /// XR_95	LOC105375299	XR_927305	0.000617685	-1.93592	cEDS down vs Normal	-2.63231	-1.42377	22.3887	2.51515	1.23574
10901	7963406	NM_005555 // KRT6B // keratin 6B, type II // 12q13.13 // 3854 /// ENST00000252252 // KR	KRT6B	NM_005555	2.51716e-05	-1.95492	cEDS down vs Normal	-2.41943	-1.57959	47.8997	2.59007	0.594802
11060	7965090	NM_001300965 // CSRP2 // cysteine and glycine-rich protein 2 // 12q21.1 // 1466 /// NM_	CSRP2	NM_001300965	8.99938e-05	-1.95596	cEDS down vs Normal	-2.50231	-1.5289	35.9318	2.59418	0.794172
13483	7989037	NM_001204450 // CCPG1 // cell cycle progression 1 // 15q21.1 // 9236 /// NM_001204451 /	CCPG1	NM_001204450	0.000179517	-1.95876	cEDS down vs Normal	-2.56041	-1.49849	30.5193	2.60525	0.939004
16424	8019709	NR_002716 // RNU2-1 // RNA, U2 small nuclear 1 // 17q12 // 6066 /// ENST00000525239 //	RNU2-1	NR_002716	0.000279228	-1.96165	cEDS down vs Normal	-2.60413	-1.47767	27.3989	2.61667	1.05053
12777	7981964	NR_003318 // SNORD116-3 // small nucleolar RNA, C/D box 116-3 // 15q11.2 // 100033415 /	SNORD116-3	NR_003318	0.00203349	-1.96425	cEDS down vs Normal	-2.84396	-1.35665	16.12	2.62697	1.7926
17502	8030360	NR_000021 // SNORD32A // small nucleolar RNA, C/D box 32A // 19q13.3 // 26819 /// ENST0	SNORD32A	NR_000021	0.00186797	-1.98188	cEDS down vs Normal	-2.87037	-1.36841	16.5224	2.69698	1.79555
30729	8159006	NR_000017 // SNORD36B // small nucleolar RNA, C/D box 36B // 9q34 // 26814 /// ENST0000	SNORD36B	NR_000017	0.000354205	-1.98243	cEDS down vs Normal	-2.66641	-1.4739	25.8206	2.69916	1.14989
14322	7997940	ENST00000484610 // RPL13 // ribosomal protein L13 // 16q24.3|17p11.2 // 6137 /// ENST00	RPL13	ENST00000484610	0.00630254	-1.98693	cEDS down vs Normal	-3.11309	-1.26816	11.3264	2.7171	2.6388
27408	8127854	NM_002395 // ME1 // malic enzyme 1, NADP(+)-dependent, cytosolic // 6q12 // 4199 /// XM	ME1	NM_002395	0.00866002	-1.99282	cEDS down vs Normal	-3.20861	-1.23771	10.1539	2.74058	2.96894
11234	7967030	NR_003925 // RNU4-1 // RNA, U4 small nuclear 1 // 12q24.31 // 26835 /// ENST00000363925	RNU4-1	NR_003925	0.00451511	-1.99725	cEDS down vs Normal	-3.06518	-1.30139	12.6355	2.75824	2.40123
6328	7918379	NM_000849 // GSTM3 // glutathione S-transferase mu 3 (brain) // 1p13.3 // 2947 /// NR_0	GSTM3	NM_000849	0.00527664	-2.00294	cEDS down vs Normal	-3.11337	-1.28856	12.0135	2.78097	2.54637
12784	7981978	NR_003330 // SNORD116-15 // small nucleolar RNA, C/D box 116-15 // 15q11.2 // 100033427	SNORD116-15	NR_003330	0.00492919	-2.00296	cEDS down vs Normal	-3.09832	-1.29485	12.2831	2.78108	2.49057
23878	8094476	NM_001292054 // TBC1D19 // TBC1 domain family, member 19 // 4p15.2 // 55296 /// NM_0183	TBC1D19	NM_001292054	2.33514e-06	-2.01137	cEDS down vs Normal	-2.39076	-1.69218	79.2299	2.81471	0.390784
12789	7981988	NR_003334 // SNORD116-20 // small nucleolar RNA, C/D box 116-20 // 15q11.2 // 100033431	SNORD116-20	NR_003334	0.00534053	-2.03188	cEDS down vs Normal	-3.19009	-1.29417	11.9662	2.89703	2.66312
15342	8008151	NM_001160423 // IGF2BP1 // insulin-like growth factor 2 mRNA binding protein 1 // 17q21	IGF2BP1	NM_001160423	0.00185228	-2.04959	cEDS down vs Normal	-3.0215	-1.39031	16.5627	2.9684	1.97144
9478	7948902	NR_002559 // SNORD29 // small nucleolar RNA, C/D box 29 // 11q13 // 9297 /// AK095849 /	SNORD29	NR_002559	0.00213488	-2.06043	cEDS down vs Normal	-3.07112	-1.38235	15.8923	3.01219	2.08492
26444	8118319	ENST00000364953 // SNORD48 // small nucleolar RNA, C/D box 48 // 6p21.33 // 26801 /// u	SNORD48	ENST00000364953	0.00788585	-2.07484	cEDS down vs Normal	-3.407	-1.26356	10.4921	3.07053	3.21917
21396	8069150	NM_198690 // KRTAP10-9 // keratin associated protein 10-9 // 21q22.3 // 386676 /// ENST	KRTAP10-9	NM_198690	0.000213274	-2.12267	cEDS down vs Normal	-2.88312	-1.5628	29.2721	3.26532	1.22706
24888	8103745	NM_021973 // HAND2 // heart and neural crest derivatives expressed 2 // 4q33 // 9464 //	HAND2	NM_021973	0.000835944	-2.13551	cEDS down vs Normal	-3.08348	-1.47898	20.6638	3.31784	1.76619
29946	8151457	NM_001040708 // HEY1 // hes-related family bHLH transcription factor with YRPW motif 1	HEY1	NM_001040708	0.00068156	-2.14408	cEDS down vs Normal	-3.07134	-1.49677	21.8172	3.35297	1.69053
12783	7981976	NR_003329 // SNORD116-14 // small nucleolar RNA, C/D box 116-14 // 15q11.2 // 100033426	SNORD116-14	NR_003329	0.00486449	-2.14873	cEDS down vs Normal	-3.47015	-1.3305	12.3357	3.37203	3.0069
20428	8059708	NR_002921 // SNORA75 // small nucleolar RNA, H/ACA box 75 // 2q37.1 // 654321 /// ENST0	SNORA75	NR_002921	0.00645139	-2.15583	cEDS down vs Normal	-3.56989	-1.3019	11.2378	3.4012	3.32922
19134	8045688	NM_007115 // TNFAIP6 // tumor necrosis factor, alpha-induced protein 6 // 2q23.3 // 713	TNFAIP6	NM_007115	0.00953625	-2.15824	cEDS down vs Normal	-3.70556	-1.25703	9.81212	3.41108	3.82404
12786	7981982	NR_001290 // SNORD116-19 // small nucleolar RNA, C/D box 116-19 // 15q11.2 // 727708 //	SNORD116-19	NR_001290	0.00716043	-2.19765	cEDS down vs Normal	-3.7195	-1.29847	10.847	3.57343	3.62385
31215	8163672	NR_103711 // PAPPA-AS1 // PAPPA antisense RNA 1 // 9q33.2 // 493913 /// ENST00000445861	PAPPA-AS1	NR_103711	0.000106099	-2.2189	cEDS down vs Normal	-2.99017	-1.64657	34.5786	3.66132	1.16472
27652	8130578	NR_002960 // SNORA20 // small nucleolar RNA, H/ACA box 20 // 6q25.3 // 677806 /// ENST0	SNORA20	NR_002960	0.00321967	-2.26712	cEDS down vs Normal	-3.66615	-1.40197	14.0494	3.86151	3.02337
27414	8127987	NR_002743 // SNORD50A // small nucleolar RNA, C/D box 50A // 6q14.3 // 26799 /// ENST00	SNORD50A	NR_002743	7.7137e-05	-2.28937	cEDS down vs Normal	-3.08646	-1.69812	37.2362	3.95419	1.16811
23249	8088180	NM_001256105 // WNT5A // wingless-type MMTV integration site family, member 5A // 3p21-	WNT5A	NM_001256105	0.00488316	-2.29057	cEDS down vs Normal	-3.85165	-1.3622	12.3205	3.95921	3.53488
7881	7933872	NM_000399 // EGR2 // early growth response 2 // 10q21.1 // 1959 /// NM_001136177 // EGR	EGR2	NM_000399	0.00582318	-2.32336	cEDS down vs Normal	-4.00324	-1.3484	11.6295	4.09616	3.87445
13059	7984257	NR_002756 // RNU5A-1 // RNA, U5A small nuclear 1 // 15q22.31 // 26831 /// ENST000003626	RNU5A-1	NR_002756	5.99376e-05	-2.33482	cEDS down vs Normal	-3.14265	-1.73465	39.4519	4.14414	1.15547
17172	8027002	NM_004864 // GDF15 // growth differentiation factor 15 // 19p13.11 // 9518 /// ENST0000	GDF15	NM_004864	0.000322074	-2.43232	cEDS down vs Normal	-3.55831	-1.66264	26.4434	4.55366	1.89425
14392	7998722	NR_002736 // SNORD60 // small nucleolar RNA, C/D box 60 // 16p13.3 // 26788 /// ENST000	SNORD60	NR_002736	0.000413141	-2.4379	cEDS down vs Normal	-3.61362	-1.64471	24.8354	4.57718	2.02731
20495	8060344	NM_001301188 // TRIB3 // tribbles pseudokinase 3 // 20p13-p12.2 // 57761 /// NM_0013011	TRIB3	NM_001301188	9.08436e-05	-2.52641	cEDS down vs Normal	-3.55186	-1.79701	35.8534	4.95085	1.51894
11233	7967028	NR_003137 // RNU4-2 // RNA, U4 small nuclear 2 // 12q24.31 // 26834 /// ENST00000365668	RNU4-2	NR_003137	0.000940261	-2.52764	cEDS down vs Normal	-3.98859	-1.60181	20.019	4.95605	2.72324
9474	7948894	ENST00000525239 // WDR74 // WD repeat domain 74 // 11q12.3 // 54663 /// ENST00000538098	WDR74	ENST00000525239	7.22458e-05	-2.53324	cEDS down vs Normal	-3.53334	-1.81622	37.8018	4.97974	1.44906
12775	7981960	NR_003321 // SNORD116-6 // small nucleolar RNA, C/D box 116-6 // 15q11.2 // 100033418 /	SNORD116-6	NR_003321	0.00237904	-2.69281	cEDS down vs Normal	-4.69407	-1.54477	15.3928	5.65579	4.04174
8892	7943711	NM_207645 // C11orf87 // chromosome 11 open reading frame 87 // 11q22.3 // 399947 /// X	C11orf87	NM_207645	0.00143076	-2.9425	cEDS down vs Normal	-5.16471	-1.67644	17.8281	6.71367	4.14237
6747	7922404	NR_003940 // SNORD80 // small nucleolar RNA, C/D box 80 // 1q25.1 // 26774 /// ENST0000	SNORD80	NR_003940	5.80468e-05	-3.1339	cEDS down vs Normal	-4.6697	-2.10321	39.7408	7.52061	2.08166
13060	7984259	NR_002757 // RNU5B-1 // RNA, U5B small nuclear 1 // 15q22.31 // 26832 /// ENST000003632	RNU5B-1	NR_002757	0.00221413	-3.6164	cEDS down vs Normal	-7.38174	-1.77171	15.723	9.5244	6.66337
25830	8112980	NM_001278642 // EDIL3 // EGF-like repeats and discoidin I-like domains 3 // 5q14 // 100	EDIL3	NM_001278642	0.0053704	-3.83425	cEDS down vs Normal	-9.02394	-1.62916	11.9443	10.4109	9.58784
